# Supplementary material for: Unraveling high precision stereocontrol in a triple cascade organocatalytic reaction
Source: Royal Society of Chemistry journal article supplement (doi:10.1039/b810901j), 2008-01-01
Supplement: b810901j.pdf [file b810901j.pdf]

*Electronic Supplementary Information*

*For*

**Unraveling High-Precision Stereocontrol in a Triple Cascade  
Organocatalytic Reaction**

*C. B. Shinisha and Raghavan B. Sunoj \**

Department of Chemistry  
Indian Institute of Technology Bombay  
Powai, Mumbai 400076, India

E-mail: [sunoj@chem.iitb.ac.in](mailto:sunoj@chem.iitb.ac.in)

Fax: 91-22-2576-7152 or 91-22-2572-3480

| <b>Table of Contents</b> |                                                                                                                                                                                |                |
|--------------------------|--------------------------------------------------------------------------------------------------------------------------------------------------------------------------------|----------------|
|                          | <b>LIST OF TABLES</b>                                                                                                                                                          | Page<br>Number |
| Table S1                 | Comparison of geometric parameters of catalyst optimized at the B3LYP/6-31G* and ONIOM2(B3LYP/6-31G*:AM1) level of theory                                                      | S4             |
| Table S2                 | Computed Relative Energies ( $\Delta E$ ) obtained at the B3LYP/6-31G* level for the catalyst                                                                                  | S4             |
| Table S3                 | Relative energies of enamine conformers formed between propanal and the catalyst calculated at the B3LYP/6-31G* level of theory                                                | S5             |
| Table S4                 | MCA and NPA analysis of nitrogens rendering electrostatic interaction in <b>TS-1f</b> and <b>TS-1a</b>                                                                         | S8             |
| Table S5                 | Global Reactivity Descriptors (GRD) of nitrostyrene and cinnamaldehyde                                                                                                         | S8             |
| Table S6                 | The optimized geometries and energetics of lower energy TSs for the addition of enamine to enal                                                                                | S9             |
| Table S7                 | Relative energies of iminium conformers formed between $\alpha,\beta$ -unsaturated aldehyde ( <b>C</b> ) and the catalyst calculated at the B3LYP/6-31G* level of theory       | S11            |
| Table S8                 | Absolute and relative activation barriers for the intramolecular aldol cyclization                                                                                             | S11            |
| Table S9                 | The computed relative energies ( $\Delta E^\ddagger$ ) at the B3LYP/6-31+G**//ONIOM2(B3LYP/6-31G*:AM1) and B3LYP/6-31+G**//ONIOM2(B3LYP/6-31G*:AM1) levels for the addition of | S13            |

|           |                                                                                                                                                                                                                                                                                                      |     |
|-----------|------------------------------------------------------------------------------------------------------------------------------------------------------------------------------------------------------------------------------------------------------------------------------------------------------|-----|
|           | enamines to ( <i>E</i> )- nitrostyrene                                                                                                                                                                                                                                                               |     |
| Table S10 | The computed relative energies ( $\Delta E^\ddagger$ ) at the B3LYP/6-31+G**//ONIOM2(B3LYP/6-31G*:AM1) and B3LYP/6-31+G**//ONIOM2(B3LYP/6-31G*:AM1) levels for the addition of nitroalkane anion to the iminium derived from the enal (C)                                                            | S13 |
|           | <b>LIST OF FIGURES</b>                                                                                                                                                                                                                                                                               |     |
| Figure S1 | Two-layered ONIOM partition scheme employed for diphenylsiloxytrimethyl prolinol ether catalyst                                                                                                                                                                                                      | S5  |
| Figure S2 | Various rotamers for the addition of ( <i>Z</i> )- <i>anti</i> -enamine ( <b>2a-f</b> ) as well as ( <i>E</i> )- <i>syn</i> -enamine ( <b>3a-f</b> ) on the <i>re/si</i> face of nitrostyrene grouped on the basis of the dihedral angles between H of the nitrostyrene and the enamine double bond. | S6  |
| Figure S3 | Key interactions detected using AIM analysis and the electron density at the bond critical points $\rho(\text{bcp})$                                                                                                                                                                                 | S7  |
| Figure S4 | Plausible pathways if the first step of the cascade sequence involve reaction between enamine and enal                                                                                                                                                                                               | S10 |
|           | <b>OTHER INFORMATION</b>                                                                                                                                                                                                                                                                             |     |
|           | Full list citations of <i>Gaussian 03</i> (Ref. 19 in the text)                                                                                                                                                                                                                                      | S12 |
|           | Total electronic energy (in a.u) and cartesian coordinates of ONIOM optimized geometries of all the transition states located in this work                                                                                                                                                           | S14 |

**Table S1** Comparison of geometric parameters of catalyst optimized at the B3LYP/6-31G\* and ONIOM(B3LYP/6-31G\*:AM1) levels of theory

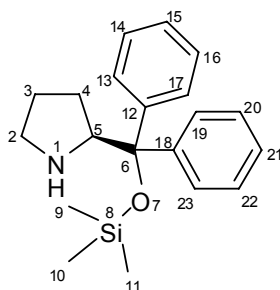

| Bond distances<br>(in Å)         | DFT  | ONIOM | Bond                                                          |      |       |
|----------------------------------|------|-------|---------------------------------------------------------------|------|-------|
|                                  |      |       | angles/Dihedral<br>angles                                     | DFT  | ONIOM |
| C <sub>5</sub> -C <sub>6</sub>   | 1.55 | 1.53  | C <sub>5</sub> C <sub>6</sub> C <sub>12</sub>                 | 107  | 107   |
| C <sub>6</sub> -C <sub>12</sub>  | 1.54 | 1.52  | C <sub>5</sub> C <sub>6</sub> C <sub>18</sub>                 | 112  | 112   |
| C <sub>6</sub> -C <sub>18</sub>  | 1.54 | 1.52  | C <sub>5</sub> C <sub>6</sub> O <sub>7</sub>                  | 110  | 111   |
| C <sub>6</sub> -O <sub>7</sub>   | 1.41 | 1.39  | N <sub>1</sub> C <sub>5</sub> C <sub>6</sub> O <sub>7</sub>   | -58  | -50   |
| O <sub>7</sub> -Si <sub>8</sub>  | 1.68 | 1.80  | N <sub>1</sub> C <sub>5</sub> C <sub>6</sub> C <sub>18</sub>  | 65   | 72    |
| Si <sub>8</sub> -C <sub>9</sub>  | 1.88 | 1.82  | N <sub>1</sub> C <sub>5</sub> C <sub>6</sub> C <sub>12</sub>  | -175 | -168  |
| Si <sub>8</sub> -C <sub>10</sub> | 1.88 | 1.83  | C <sub>5</sub> C <sub>6</sub> C <sub>12</sub> C <sub>17</sub> | 111  | 112   |
| Si <sub>8</sub> -C <sub>11</sub> | 1.86 | 1.81  | C <sub>5</sub> C <sub>6</sub> C <sub>12</sub> C <sub>23</sub> | 16   | 14    |
| C <sub>12</sub> -C <sub>17</sub> | 1.39 | 1.40  | C <sub>5</sub> C <sub>6</sub> O <sub>7</sub> Si <sub>8</sub>  | 62   | 50    |

**Table S2** Computed Relative Energies ( $\Delta E$ ) obtained at the B3LYP/6-31G\* level for the catalyst

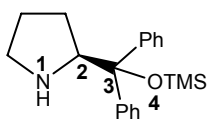

| Dihedral angle (N <sub>1</sub> C <sub>2</sub> C <sub>3</sub> O <sub>4</sub> ) | Relative $\Delta E$ in kcal/mol |
|-------------------------------------------------------------------------------|---------------------------------|
| +60                                                                           | 0.0                             |
| 180                                                                           | 3.2                             |
| -60                                                                           | 2.9                             |

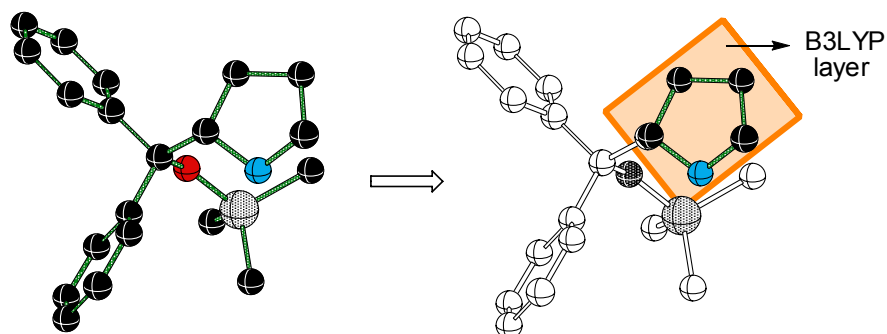

**Figure S1.** Two-layered ONIOM partition scheme employed for diphenylsiloxyltrimethylprolinol ether catalyst. Atoms separated by white bonds represents the lower AM1 layer and the dark bond the higher B3LYP layer (hydrogens are omitted for clarity).

**Table S3** Relative energies of enamine conformers formed between propanal and the catalyst calculated at the B3LYP/6-31G\* level of theory

| Enamine                           | Relative energy in kcal/mol |
|-----------------------------------|-----------------------------|
| <i>(E)</i> - <i>anti</i> -enamine | 0.0                         |
| <i>(Z)</i> - <i>anti</i> -enamine | 2.2                         |
| <i>(E)</i> - <i>syn</i> -enamine  | 0.2                         |
| <i>(Z)</i> - <i>syn</i> -enamine  | 10.7                        |

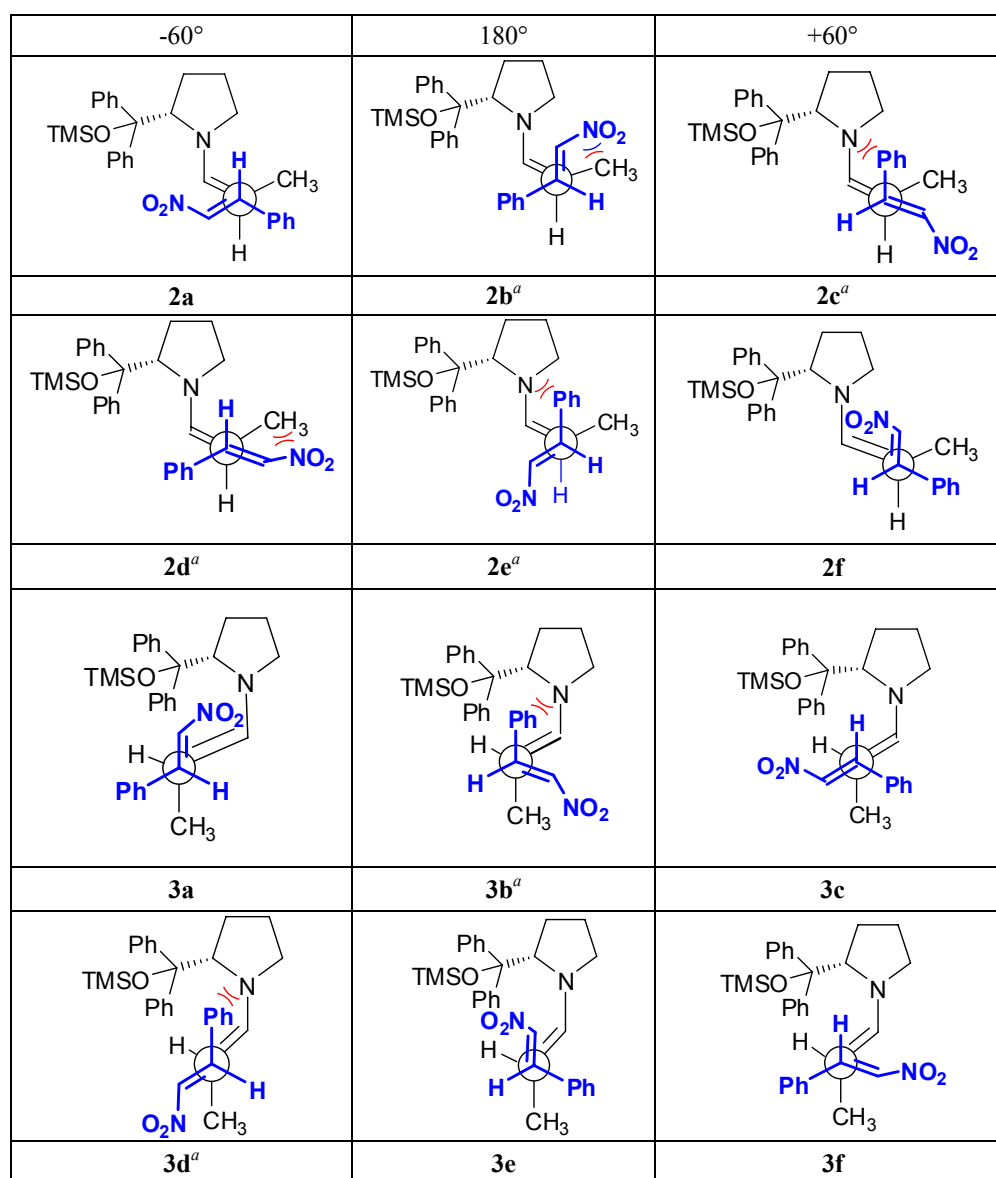

<sup>a</sup>In spite of repeated attempts we could not locate transition states corresponding to these rotamers. Different initial guess sets were tried varying the crucial dihedral angles, bond lengths etc.,. These rotamers are highly destabilized because of the gauche interactions between both phenyl group on nucleophile and pyrrolidine nitrogen or nitro group on nucleophiles and methyl group on electrophiles.

**Figure S2.** Various rotamers for the addition of (*Z*)-*anti*-enamine (**2a-f**) as well as (*E*)-*syn*-enamine (**3a-f**) on the *re/si* face of nitrostyrene grouped on the basis of the dihedral angles between H of the nitrostyrene and the enamine double bond

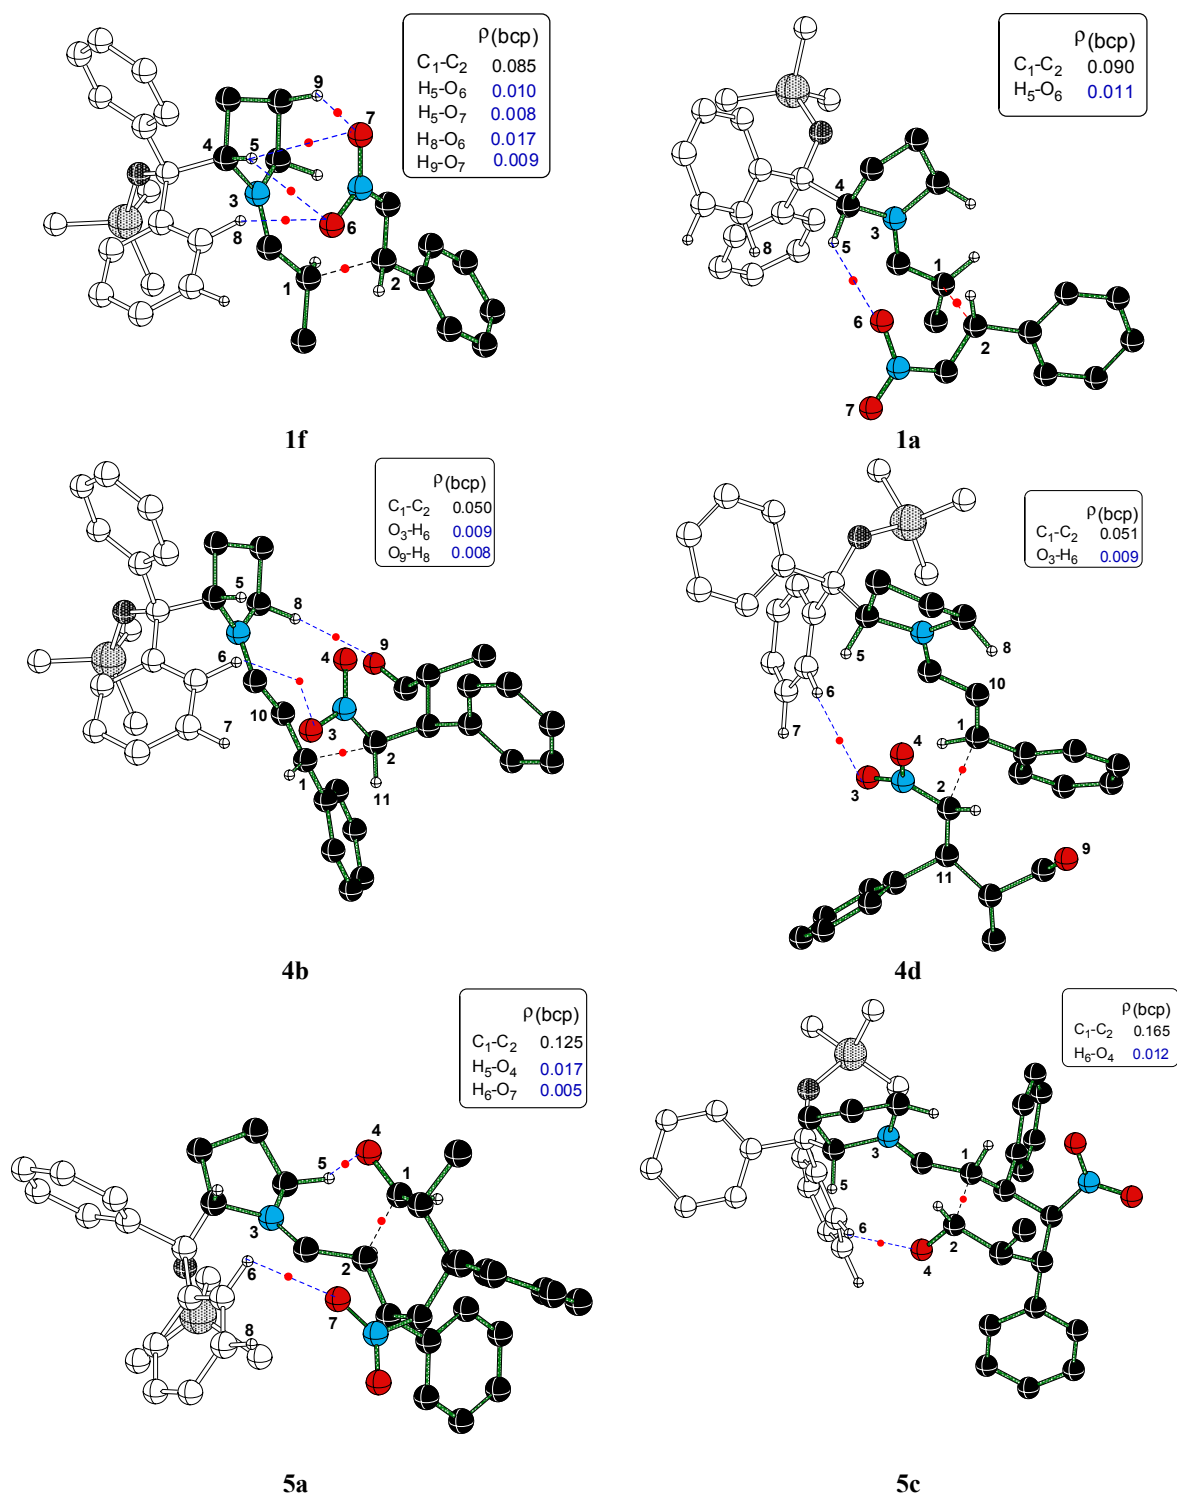

**Figure S3.** Key interactions detected using the AIM analysis and the electron densities at the bond critical points ( $\rho(\text{bcp})$ ).

**Table S4** Mulliken charge analysis (MCA) and Natural population analysis (NPA) on nitrogens ( $N^*$ ) on **TS-1f** and **TS-1a** involving in electrostatic interaction

|              | $-N^*O_2$ | -Pyrrolidine $N^*$ | Level of theory |     |
|--------------|-----------|--------------------|-----------------|-----|
| <b>TS-1f</b> | 0.53      | -0.21              | I               | MCA |
|              | 0.40      | -0.40              | II              |     |
|              | 0.44      | -0.37              | II              | NPA |
| <b>TS-1a</b> | 0.48      | -0.32              | I               | MCA |
|              | 0.41      | -0.38              | II              |     |
|              | 0.44      | -0.38              | II              | NPA |

I. ONIOM(B3LYP/6-31G\*:AM1) II. B3LYP/6-31G\*\*/ONIOM(B3LYP/6-31G\*:AM1)

**Table S5** Global Reactivity Descriptors (GRD) of nitrostyrene and cinnamaldehyde. Values are given in a.u.

|                                                                   | Method | Nitrostyrene | Cinnamaldehyde |
|-------------------------------------------------------------------|--------|--------------|----------------|
| Absolute Electronegativity<br>( $\chi = \frac{1}{2}(I^a + A^b)$ ) | I      | 0.1763       | 0.1589         |
|                                                                   | II     | 0.1847       | 0.1685         |
|                                                                   | III    | 0.1530       | 0.1229         |
| Hardness<br>( $\eta = \frac{1}{2}(I - A)$ )                       | I      | 0.1409       | 0.1418         |
|                                                                   | II     | 0.1397       | 0.1401         |
|                                                                   | III    | 0.1241       | 0.1304         |
| Electrophilicity index<br>( $\omega = \mu^2/2\eta$ )              | I      | 0.0022       | 0.0017         |
|                                                                   | II     | 0.0024       | 0.0020         |
|                                                                   | III    | 0.0015       | 0.0010         |
| LUMO Energy                                                       | III    | 0.0333       | 0.0595         |

<sup>a</sup> Ionization potential <sup>b</sup> Electron affinity

I. UB3LYP/6-31G\* II. UB3LYP/6-311G\*\* III. MP2/6-31G\*\*/UB3LYP/6-311G\*\*



**Table S6** The optimized geometries and energetics of the lower energy TSs for the addition of enamine to enal

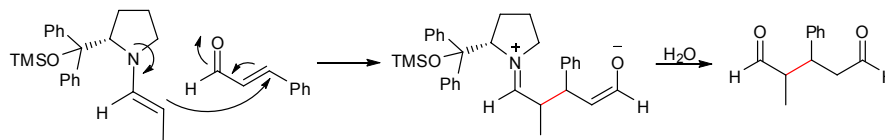

|                                                                                |                                                                              |
|--------------------------------------------------------------------------------|------------------------------------------------------------------------------|
|                                                                                |                                                                              |
| Enamine adding to the <i>re</i> face of enal<br>$\Delta E^{\ddagger a} = 29.2$ | Enamine adding to the <i>si</i> face of enal<br>$\Delta E^{\ddagger} = 30.7$ |

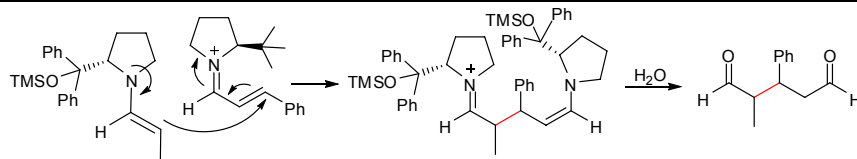

|                                                  |                                                  |
|--------------------------------------------------|--------------------------------------------------|
|                                                  |                                                  |
| $\Delta E_{TS-R} = 14.8$ $\Delta E_{TS-P} = 7.9$ | $\Delta E_{TS-R} = 13.7$ $\Delta E_{TS-P} = 6.0$ |

<sup>a</sup> Absolute activation barriers with respect to isolated reactants in kcal/mol

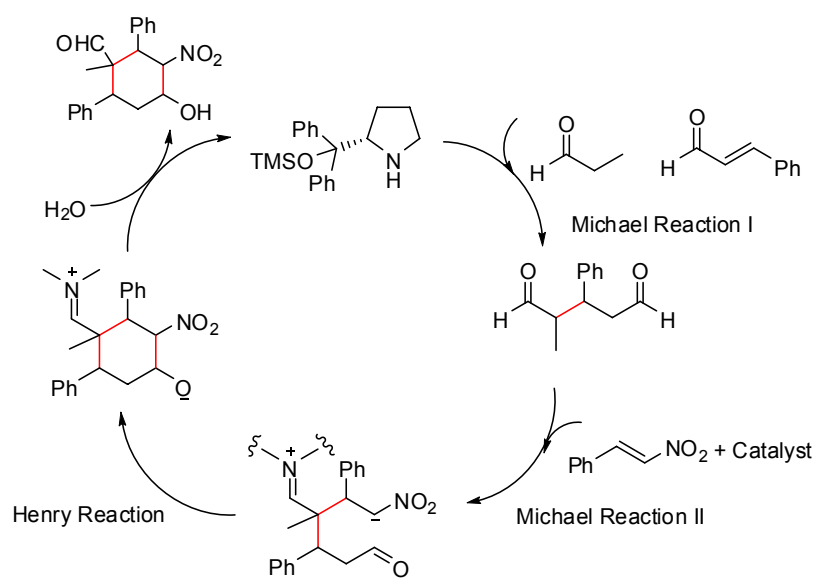

Pathway 1

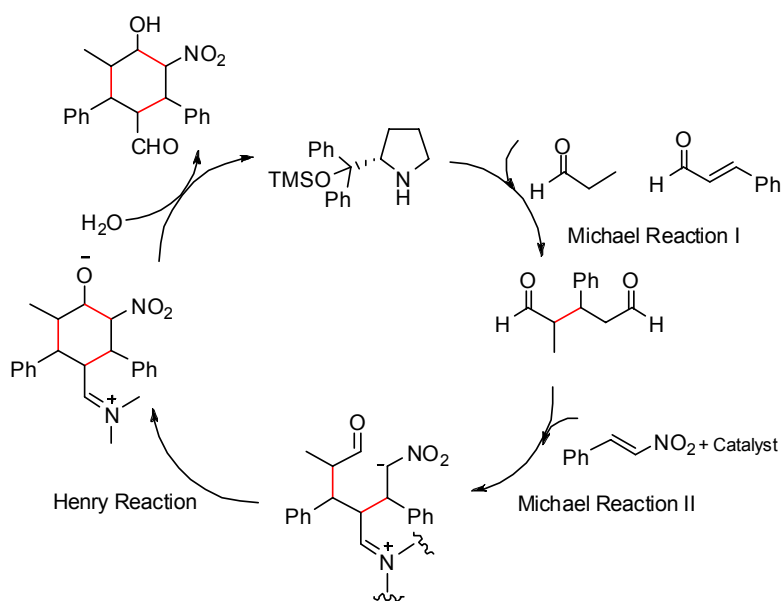

Pathway 2

**Figure S4.** Alternative mechanism if the first step involves reaction between enal and enamine

**Table S7** Relative energies of iminium conformers formed between  $\alpha,\beta$ -unsaturated aldehyde (C) and the catalyst calculated at the B3LYP/6-31G\* in kcal/mol

|                    |                    |                    |                  |
|--------------------|--------------------|--------------------|------------------|
|                    |                    |                    |                  |
| <i>Z,s-trans,E</i> | <i>Z,s-trans,Z</i> | <i>E,s-trans,E</i> | <i>E,s-cis,Z</i> |
| 1.52               | 6.12               | 0.00               | 6.66             |

**Table S8** Computed activation barriers ( $\Delta E^\ddagger$ ) at the B3LYP/6-31G\*\*/ONIOM(B3LYP/6-31G\*:AM1) level for the intramolecular cyclization <sup>a</sup>

| Total Energy of PRC in a.u | Transition state | $\Delta E^\ddagger$ in kcal/mol |          | Relative $\Delta E^\ddagger$ at the B3LYP/6-31+G** level in kcal/mol |
|----------------------------|------------------|---------------------------------|----------|----------------------------------------------------------------------|
|                            |                  | Absolute                        | Relative |                                                                      |
| -2251.764704               | <b>TS-5a</b>     | 21.43                           | 0.00     | 0.0                                                                  |
| -2251.747337               | <b>TS-5b</b>     | 22.44                           | 11.90    | 11.1                                                                 |
| -2251.751410               | <b>TS-5c</b>     | 22.25                           | 9.15     | 9.6                                                                  |
| -2251.748843               | <b>TS-5d</b>     | 22.11                           | 10.63    | 11.0                                                                 |

<sup>a</sup> Absolute barriers are with respect to the corresponding pre-reacting complexes while the relative barriers are with respect to **TS-5a**.

**Ref. 19) Gaussian 03**, Revision C.02, M. J. Frisch, G. W. Trucks, H. B. Schlegel, G. E. Scuseria, M. A. Robb, J. R. Cheeseman, J. A. Montgomery, Jr., T. Vreven, K. N. Kudin, J. C. Burant, J. M. Millam, S. S. Iyengar, J. Tomasi, V. Barone, B. Mennucci, M. Cossi, G. Scalmani, N. Rega, G. A. Petersson, H. Nakatsuji, M. Hada, M. Ehara, K. Toyota, R. Fukuda, J. Hasegawa, M. Ishida, T. Nakajima, Y. Honda, O. Kitao, H. Nakai, M. Klene, X. Li, J. E. Knox, H. P. Hratchian, J. B. Cross, V. Bakken, C. Adamo, J. Jaramillo, R. Gomperts, R. E. Stratmann, O. Yazyev, A. J. Austin, R. Cammi, C. Pomelli, J. W. Ochterski, P. Y. Ayala, K. Morokuma, G. A. Voth, P. Salvador, J. J. Dannenberg, V. G. Zakrzewski, S. Dapprich, A. D. Daniels, M. C. Strain, O. Farkas, D. K. Malick, A. D. Rabuck, K. Raghavachari, J. B. Foresman, J. V. Ortiz, Q. Cui, A. G. Baboul, S. Clifford, J. Cioslowski, B. B. Stefanov, G. Liu, A. Liashenko, P. Piskorz, I. Komaromi, R. L. Martin, D. J. Fox, T. Keith, M. A. Al-Laham, C. Y. Peng, A. Nanayakkara, M. Challacombe, P. M. W. Gill, B. Johnson, W. Chen, M. W. Wong, C. Gonzalez, and J. A. Pople, Gaussian, Inc., Wallingford CT, 2004.

**Table S9** The computed relative energy ( $\Delta E^\ddagger$ ) at the B3LYP/6-31+G\*\*//ONIOM2(B3LYP/6-31G\*:AM1) and B3LYP/6-31+G\*\*//ONIOM2(B3LYP/6-31G\*:AM1) levels for the addition of enamines to (*E*)-nitrostyrene

| Enamine          | Transition state | Relative Energy $\Delta E^\ddagger$ in kcal/mol |                |
|------------------|------------------|-------------------------------------------------|----------------|
|                  |                  | B3LYP/6-31+G*                                   | B3LYP/6-31+G** |
| <i>(E)</i> -anti | <b>TS-1a</b>     | 2.6                                             | 2.8            |
|                  | <b>TS-1b</b>     | 6.8                                             | 7.0            |
|                  | <b>TS-1d</b>     | 6.1                                             | 6.3            |
|                  | <b>TS-1f</b>     | 0.0                                             | 0.0            |
| <i>(Z)</i> -anti | <b>TS-2a</b>     | 6.0                                             | 6.1            |
|                  | <b>TS-2f</b>     | 6.7                                             | 6.9            |
| <i>(E)</i> -syn  | <b>TS-3a</b>     | 6.5                                             | 6.5            |
|                  | <b>TS-3c</b>     | 8.8                                             | 8.9            |
|                  | <b>TS-3e</b>     | 9.0                                             | 9.0            |
|                  | <b>TS-3f</b>     | 8.5                                             | 8.6            |

**Table S10** The computed relative energy ( $\Delta E^\ddagger$ ) at the B3LYP/6-31+G\*\*//ONIOM2(B3LYP/6-31G\*:AM1) and B3LYP/6-31+G\*\*//ONIOM2(B3LYP/6-31G\*:AM1) levels for the addition of nitroalkane anion to the iminium derived from the enal (C)

| Transition state | Relative Energy $\Delta E^\ddagger$ in kcal/mol |                |
|------------------|-------------------------------------------------|----------------|
|                  | B3LYP/6-31+G*                                   | B3LYP/6-31+G** |
| <b>TS-4b</b>     | 0.0                                             | 0.0            |
| <b>TS-4c</b>     | 2.5                                             | 2.6            |
| <b>TS-4d</b>     | 0.9                                             | 1.0            |
| <b>TS-4e</b>     | 3.5                                             | 3.3            |

ONIOM2(B3LYP/6-31G\*:AM1) optimized geometries and Cartesian coordinates for the transition states for **(I)** the Michael addition between (*E*)-nitrostyrene and different conformers of enamine **(II)** the Michael addition between iminium and nitroalkane **(III)** Intramolecular cyclization. Electronic energies in the gas phase (in a.u) at the ONIOM2(B3LYP/6-31G\*:AM1). Single point energies calculated in the gas phase using the B3LYP/6-31G\*\*/ONIOM2(B3LYP/6-31G\*:AM1) are given in parenthesis

**I. Michael addition between (*E*)-nitrostyrene and different conformers of enamine**

| <b>1a</b>                                                                         |           |           |           |
|-----------------------------------------------------------------------------------|-----------|-----------|-----------|
| <b>Et = -843.463951(-1828.732300)</b>                                             |           |           |           |
| 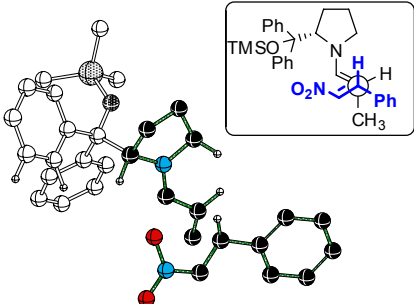 |           |           |           |
| 7                                                                                 | 0.507371  | -0.428673 | -0.541368 |
| 6                                                                                 | -0.682922 | 0.373310  | -0.930714 |
| 6                                                                                 | -0.751563 | 0.099851  | -2.452566 |
| 6                                                                                 | -0.258619 | -1.350680 | -2.591114 |
| 6                                                                                 | 0.861391  | -1.450381 | -1.545901 |
| 1                                                                                 | -0.430707 | 1.416623  | -0.713399 |
| 1                                                                                 | -0.068619 | 0.789187  | -2.960626 |
| 1                                                                                 | -1.758040 | 0.242441  | -2.858307 |
| 1                                                                                 | -1.071064 | -2.044328 | -2.339884 |
| 1                                                                                 | 0.096210  | -1.590852 | -3.596983 |
| 1                                                                                 | 0.930383  | -2.438244 | -1.075691 |
| 1                                                                                 | 1.838978  | -1.213759 | -1.979149 |
| 6                                                                                 | -2.033420 | 0.053753  | -0.204996 |
| 8                                                                                 | -2.343355 | -1.272649 | -0.515501 |
| 14                                                                                | -3.594943 | -2.358512 | 0.195692  |
| 6                                                                                 | -4.864547 | -1.511622 | 1.164360  |
| 1                                                                                 | -5.732907 | -1.199120 | 0.538227  |
| 1                                                                                 | -4.459953 | -0.586829 | 1.644377  |
| 1                                                                                 | -5.263314 | -2.156018 | 1.982793  |
| 6                                                                                 | -4.275954 | -3.135807 | -1.295061 |
| 1                                                                                 | -4.329462 | -4.245580 | -1.204935 |
| 1                                                                                 | -3.632914 | -2.906990 | -2.179390 |
| 1                                                                                 | -5.303022 | -2.773199 | -1.531671 |
| 6                                                                                 | -2.674568 | -3.559089 | 1.192464  |
| 1                                                                                 | -3.241486 | -4.509134 | 1.331236  |
| 1                                                                                 | -2.437065 | -3.162612 | 2.207593  |
| 1                                                                                 | -1.703595 | -3.820979 | 0.709412  |
| 6                                                                                 | -3.026859 | 1.033816  | -0.828830 |
| 6                                                                                 | -2.779026 | 2.415074  | -0.787713 |
| 6                                                                                 | -3.654376 | 3.311912  | -1.396860 |
| 6                                                                                 | -4.788558 | 2.846482  | -2.062149 |
| 6                                                                                 | -5.037293 | 1.476758  | -2.119449 |
| 6                                                                                 | -4.158967 | 0.579394  | -1.513213 |
| 1                                                                                 | -1.887629 | 2.806701  | -0.269877 |
| 1                                                                                 | -3.443125 | 4.391180  | -1.355094 |
| 1                                                                                 | -5.478364 | 3.555808  | -2.542005 |
| 1                                                                                 | -5.924496 | 1.098560  | -2.648268 |
| 1                                                                                 | -4.356653 | -0.503633 | -1.584105 |
| 6                                                                                 | -1.897436 | 0.253174  | 1.298159  |
| 6                                                                                 | -1.117624 | -0.646781 | 2.043095  |
| 6                                                                                 | -0.953602 | -0.488927 | 3.417634  |
| 6                                                                                 | -1.576159 | 0.567677  | 4.081004  |
| 6                                                                                 | -2.379758 | 1.447680  | 3.359851  |
| 6                                                                                 | -2.547277 | 1.285993  | 1.983821  |
| 1                                                                                 | -3.215271 | 1.985086  | 1.456783  |
| 1                                                                                 | -2.888867 | 2.276560  | 3.874429  |
| 1                                                                                 | -1.438697 | 0.700826  | 5.163982  |
| 1                                                                                 | -0.330825 | -1.201810 | 3.978317  |
| 1                                                                                 | -0.649472 | -1.511940 | 1.546548  |
| 6                                                                                 | 1.302450  | -0.062351 | 0.456916  |
| 6                                                                                 | 2.612296  | -0.550207 | 0.717107  |
| 1                                                                                 | 0.896790  | 0.712405  | 1.099706  |
| 1                                                                                 | 2.854824  | -1.496076 | 0.233485  |
| 6                                                                                 | 3.796224  | 0.643252  | -0.339921 |
| 6                                                                                 | 3.852370  | 1.947758  | 0.214463  |
| 1                                                                                 | 3.191165  | 0.594403  | -1.241729 |
| 1                                                                                 | 4.656080  | 2.342292  | 0.816383  |
| 6                                                                                 | 5.063782  | -0.142741 | -0.442788 |
| 6                                                                                 | 6.115630  | -0.019878 | 0.480812  |
| 6                                                                                 | 7.283099  | -0.769821 | 0.340730  |
| 6                                                                                 | 7.426193  | -1.661725 | -0.723595 |
| 6                                                                                 | 6.390182  | -1.796535 | -1.649468 |
| 6                                                                                 | 5.223739  | -1.047048 | -1.505246 |
| 1                                                                                 | 6.025343  | 0.671813  | 1.312523  |
| 1                                                                                 | 8.084781  | -0.653807 | 1.065152  |
| 1                                                                                 | 8.337071  | -2.243954 | -0.831781 |
| 1                                                                                 | 6.491544  | -2.482031 | -2.486748 |
| 1                                                                                 | 4.424332  | -1.151860 | -2.236443 |
| 7                                                                                 | 2.771749  | 2.781428  | 0.092892  |
| 8                                                                                 | 1.736019  | 2.333467  | -0.511798 |
| 8                                                                                 | 2.803925  | 3.934820  | 0.578495  |
| 6                                                                                 | 3.091615  | -0.449244 | 2.153796  |
| 1                                                                                 | 2.957980  | 0.568664  | 2.537104  |
| 1                                                                                 | 2.545653  | -1.133544 | 2.815441  |
| 1                                                                                 | 4.154399  | -0.699755 | 2.224873  |
| NImag = 1                                                                         |           |           |           |
| Imag. Freq = -344                                                                 |           |           |           |

| <b>1b</b>                                                                         |           |           |           |                    |           |           |           |
|-----------------------------------------------------------------------------------|-----------|-----------|-----------|--------------------|-----------|-----------|-----------|
| <b>Et = -843.464003(-1838.726854)</b>                                             |           |           |           |                    |           |           |           |
| 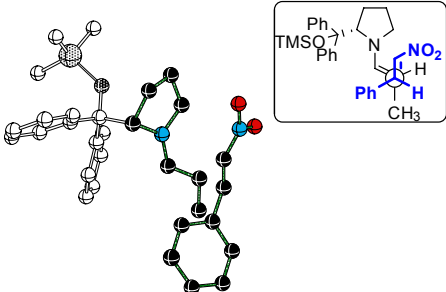 |           |           |           |                    |           |           |           |
| 7                                                                                 | -0.612196 | 0.972640  | 0.401674  | 6                  | 0.385857  | -2.884054 | 2.264289  |
| 6                                                                                 | 0.391797  | 0.506583  | -0.603589 | 6                  | 0.719677  | -2.160312 | 1.121722  |
| 6                                                                                 | 0.609484  | 1.816900  | -1.403829 | 1                  | 0.503508  | -2.578493 | 0.126037  |
| 6                                                                                 | 0.520423  | 2.947851  | -0.359012 | 1                  | -0.101306 | -3.865759 | 2.167514  |
| 6                                                                                 | -0.411728 | 2.406611  | 0.741424  | 1                  | 0.411094  | -2.941627 | 4.430505  |
| 1                                                                                 | -0.094267 | -0.274469 | -1.199870 | 1                  | 1.506770  | -0.706262 | 4.638553  |
| 1                                                                                 | -0.204182 | 1.926444  | -2.126523 | 1                  | 2.086254  | 0.598327  | 2.598517  |
| 1                                                                                 | 1.565020  | 1.829694  | -1.936299 | 6                  | -1.531322 | 0.190295  | 0.934714  |
| 1                                                                                 | 1.511209  | 3.165605  | 0.054999  | 6                  | -2.756320 | 0.649176  | 1.501679  |
| 1                                                                                 | 0.109964  | 3.857322  | -0.800349 | 1                  | -1.425526 | -0.872788 | 0.716007  |
| 1                                                                                 | 0.046892  | 2.452557  | 1.736682  | 1                  | -2.735945 | 1.686138  | 1.831990  |
| 1                                                                                 | -1.368084 | 2.932780  | 0.772309  | 6                  | -3.448333 | -0.276232 | 2.490285  |
| 6                                                                                 | 1.701619  | -0.121586 | -0.024950 | 1                  | -2.970504 | -0.225575 | 3.475826  |
| 8                                                                                 | 2.539402  | 0.945405  | 0.293416  | 1                  | -4.497273 | 0.010985  | 2.619242  |
| 14                                                                                | 4.334568  | 1.068437  | 0.250010  | 1                  | -3.430130 | -1.318919 | 2.156392  |
| 6                                                                                 | 5.112079  | -0.285844 | 1.164328  | 6                  | -3.891211 | 0.897187  | 0.029439  |
| 1                                                                                 | 6.067996  | 0.033110  | 1.642745  | 6                  | -3.318129 | 1.661708  | -1.039389 |
| 1                                                                                 | 5.346109  | -1.159589 | 0.511723  | 1                  | -3.046462 | 1.246899  | -1.998443 |
| 1                                                                                 | 4.444392  | -0.655500 | 1.979573  | 1                  | -4.594406 | 1.483774  | 0.623130  |
| 6                                                                                 | 4.901811  | 1.159576  | -1.464702 | 7                  | -3.027748 | 2.986233  | -0.889118 |
| 1                                                                                 | 5.173581  | 2.199839  | -1.761012 | 8                  | -2.474009 | 3.611751  | -1.834919 |
| 1                                                                                 | 4.104825  | 0.816941  | -2.169396 | 8                  | -3.276040 | 3.550026  | 0.227231  |
| 1                                                                                 | 5.796959  | 0.520617  | -1.649023 | 6                  | -4.453372 | -0.433186 | -0.380562 |
| 6                                                                                 | 4.527174  | 2.650832  | 1.111482  | 6                  | -5.755668 | -0.793954 | -0.003629 |
| 1                                                                                 | 3.527350  | 3.115748  | 1.294349  | 6                  | -6.304139 | -2.018843 | -0.385968 |
| 1                                                                                 | 5.126364  | 3.383433  | 0.522437  | 6                  | -5.556589 | -2.913869 | -1.151796 |
| 1                                                                                 | 5.023339  | 2.536591  | 2.102808  | 6                  | -4.258530 | -2.570448 | -1.535750 |
| 6                                                                                 | 2.297275  | -1.065759 | -1.065637 | 6                  | -3.715204 | -1.344744 | -1.152968 |
| 6                                                                                 | 2.113074  | -0.868274 | -2.439383 | 1                  | -6.349733 | -0.098863 | 0.584523  |
| 6                                                                                 | 2.666019  | -1.751049 | -3.367640 | 1                  | -7.317492 | -2.271559 | -0.085736 |
| 6                                                                                 | 3.415299  | -2.844834 | -2.939114 | 1                  | -5.980868 | -3.868725 | -1.449272 |
| 6                                                                                 | 3.611189  | -3.049415 | -1.573804 | 1                  | -3.668402 | -3.257717 | -2.136386 |
| 6                                                                                 | 3.057759  | -2.168571 | -0.646678 | 1                  | -2.706987 | -1.086587 | -1.468627 |
| 1                                                                                 | 1.528734  | -0.014766 | -2.816282 | NImag = 1          |           |           |           |
| 1                                                                                 | 2.507234  | -1.578617 | -4.442910 | Imag. Freq. = -215 |           |           |           |
| 1                                                                                 | 3.849385  | -3.540927 | -3.671861 |                    |           |           |           |
| 1                                                                                 | 4.202734  | -3.908706 | -1.224120 |                    |           |           |           |
| 1                                                                                 | 3.222765  | -2.347129 | 0.428991  |                    |           |           |           |
| 6                                                                                 | 1.347979  | -0.911362 | 1.229620  |                    |           |           |           |
| 6                                                                                 | 1.617709  | -0.393977 | 2.500811  |                    |           |           |           |
| 6                                                                                 | 1.284690  | -1.121529 | 3.644130  |                    |           |           |           |
| 6                                                                                 | 0.671285  | -2.367527 | 3.529046  |                    |           |           |           |



| <b>1d</b>                                                                         |           |           |           |                   |           |           |           |
|-----------------------------------------------------------------------------------|-----------|-----------|-----------|-------------------|-----------|-----------|-----------|
| <b>Et = -843.460768 (-1828.727039)</b>                                            |           |           |           |                   |           |           |           |
| 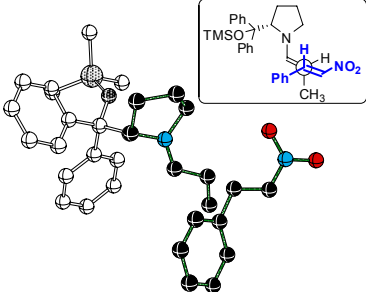 |           |           |           |                   |           |           |           |
| 7                                                                                 | 0.518699  | -0.600429 | -0.601268 | 6                 | -1.179091 | 1.299344  | 3.930781  |
| 6                                                                                 | -0.615381 | 0.260770  | -1.032580 | 6                 | -1.937619 | 2.131177  | 3.110320  |
| 6                                                                                 | -0.874920 | -0.198077 | -2.507998 | 6                 | -2.199625 | 1.771702  | 1.787540  |
| 6                                                                                 | 0.263113  | -1.181098 | -2.847620 | 1                 | -2.835619 | 2.439365  | 1.185779  |
| 6                                                                                 | 0.640780  | -1.774992 | -1.489286 | 1                 | -2.341208 | 3.075571  | 3.505831  |
| 1                                                                                 | -0.269306 | 1.299472  | -0.974837 | 1                 | -0.969495 | 1.585901  | 4.971900  |
| 1                                                                                 | -0.912158 | 0.658421  | -3.186647 | 1                 | -0.115930 | -0.584535 | 4.066247  |
| 1                                                                                 | -1.843730 | -0.708693 | -2.567837 | 1                 | -0.610743 | -1.245230 | 1.736872  |
| 1                                                                                 | -0.045995 | -1.947568 | -3.563020 | 6                 | 1.331179  | -0.296394 | 0.402604  |
| 1                                                                                 | 1.127415  | -0.656634 | -3.269338 | 6                 | 2.538574  | -0.971224 | 0.740017  |
| 1                                                                                 | -0.092656 | -2.530596 | -1.170596 | 1                 | 1.094536  | 0.640106  | 0.908253  |
| 1                                                                                 | 1.645787  | -2.198654 | -1.449191 | 1                 | 2.573836  | -2.010851 | 0.416331  |
| 6                                                                                 | -1.932630 | 0.160762  | -0.188549 | 6                 | 3.829324  | -0.354682 | -0.470250 |
| 8                                                                                 | -2.326430 | -1.175244 | -0.275783 | 1                 | 3.255094  | -0.541419 | -1.377729 |
| 14                                                                                | -3.577517 | -2.106821 | 0.634583  | 6                 | 3.043678  | -0.772531 | 2.157803  |
| 6                                                                                 | -4.703547 | -1.073388 | 1.598353  | 1                 | 3.012242  | 0.278797  | 2.465386  |
| 1                                                                                 | -5.059484 | -1.592453 | 2.519577  | 1                 | 2.452535  | -1.353475 | 2.875655  |
| 1                                                                                 | -5.608673 | -0.779701 | 1.016714  | 1                 | 4.080932  | -1.119662 | 2.226685  |
| 1                                                                                 | -4.207367 | -0.128061 | 1.928452  | 6                 | 4.960712  | -1.218130 | -0.368957 |
| 6                                                                                 | -4.428873 | -2.983016 | -0.702360 | 1                 | 5.886485  | -0.982873 | 0.132251  |
| 1                                                                                 | -4.508862 | -4.077317 | -0.502574 | 6                 | 4.056548  | 1.111175  | -0.245975 |
| 1                                                                                 | -3.872762 | -2.866649 | -1.664232 | 6                 | 3.368882  | 2.043380  | -1.039434 |
| 1                                                                                 | -5.462945 | -2.602438 | -0.871150 | 6                 | 3.545159  | 3.415716  | -0.862192 |
| 6                                                                                 | -2.626231 | -3.241840 | 1.672378  | 6                 | 4.415883  | 3.887640  | 0.121191  |
| 1                                                                                 | -3.173341 | -4.195099 | 1.862476  | 6                 | 5.109478  | 2.974276  | 0.916898  |
| 1                                                                                 | -2.378661 | -2.799564 | 2.665629  | 6                 | 4.932525  | 1.602441  | 0.735114  |
| 1                                                                                 | -1.658664 | -3.511552 | 1.184478  | 1                 | 2.701554  | 1.683811  | -1.820267 |
| 6                                                                                 | -2.905389 | 1.092703  | -0.909758 | 1                 | 3.009217  | 4.115468  | -1.498329 |
| 6                                                                                 | -2.574807 | 2.440652  | -1.119879 | 1                 | 4.557906  | 4.955585  | 0.261506  |
| 6                                                                                 | -3.435996 | 3.284961  | -1.817177 | 1                 | 5.795733  | 3.329469  | 1.681014  |
| 6                                                                                 | -4.640927 | 2.797388  | -2.323495 | 1                 | 5.484225  | 0.908041  | 1.360940  |
| 6                                                                                 | -4.974284 | 1.458411  | -2.130941 | 7                 | 4.879527  | -2.506771 | -0.844607 |
| 6                                                                                 | -4.109818 | 0.613683  | -1.435231 | 8                 | 3.781415  | -2.912777 | -1.349249 |
| 1                                                                                 | -1.631139 | 2.849080  | -0.725670 | 8                 | 5.883475  | -3.250440 | -0.770649 |
| 1                                                                                 | -3.161576 | 4.339507  | -1.969790 | NImag = 1         |           |           |           |
| 1                                                                                 | -5.320361 | 3.464841  | -2.873492 | Imag. Freq = -249 |           |           |           |
| 1                                                                                 | -5.918858 | 1.061538  | -2.532010 |                   |           |           |           |
| 1                                                                                 | -4.377157 | -0.449262 | -1.308387 |                   |           |           |           |
| 6                                                                                 | -1.690725 | 0.582621  | 1.252717  |                   |           |           |           |
| 6                                                                                 | -0.958581 | -0.264060 | 2.101714  |                   |           |           |           |
| 6                                                                                 | -0.699195 | 0.092446  | 3.423509  |                   |           |           |           |

| <b>1f</b>                                                                         |           |           |           |                   |           |           |           |
|-----------------------------------------------------------------------------------|-----------|-----------|-----------|-------------------|-----------|-----------|-----------|
| <b>Et = -843.473496 (-1828.740296)</b>                                            |           |           |           |                   |           |           |           |
| 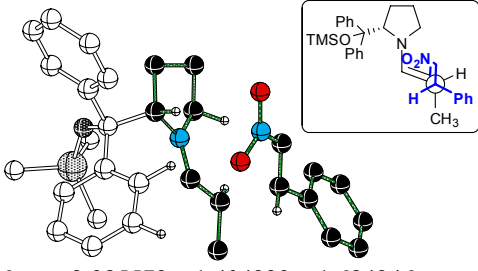 |           |           |           |                   |           |           |           |
| 6                                                                                 | 2.985579  | 1.404233  | 1.684246  | 1                 | 1.435424  | 3.559013  | -3.458295 |
| 6                                                                                 | 2.140274  | 0.352374  | 1.297808  | 1                 | 1.251643  | 1.774993  | -3.386274 |
| 6                                                                                 | 1.436838  | -0.338990 | 2.290903  | 1                 | -0.059073 | 2.841637  | -2.771270 |
| 6                                                                                 | 1.549468  | 0.039365  | 3.630032  | 1                 | -0.309735 | 2.854561  | 0.015748  |
| 6                                                                                 | 2.375557  | 1.098490  | 3.999425  | 1                 | 1.097699  | 3.061933  | 1.111218  |
| 6                                                                                 | 3.097957  | 1.779929  | 3.019898  | 1                 | 0.598158  | 4.401229  | 0.025355  |
| 6                                                                                 | 2.137280  | -0.075027 | -0.160964 | 1                 | -0.679209 | 0.572358  | -2.722555 |
| 8                                                                                 | 2.358366  | 0.972452  | -1.058874 | 1                 | -2.052481 | -0.352814 | -2.070226 |
| 14                                                                                | 1.830365  | 2.679560  | -1.195927 | 1                 | 1.726357  | -0.797063 | -2.620168 |
| 6                                                                                 | 0.714628  | 3.292904  | 0.087646  | 1                 | -0.822246 | -2.448464 | -2.188129 |
| 6                                                                                 | 0.888681  | -0.879975 | -0.604059 | 1                 | -0.313388 | -1.649240 | -3.701294 |
| 6                                                                                 | 1.103867  | -1.476344 | -2.020676 | 6                 | -1.030403 | 0.472327  | 0.255408  |
| 6                                                                                 | -0.307069 | -1.580024 | -2.609531 | 6                 | -2.370799 | 0.932570  | 0.246162  |
| 6                                                                                 | -0.966833 | -0.296146 | -2.108778 | 1                 | -0.466545 | 0.530947  | 1.182331  |
| 7                                                                                 | -0.407474 | -0.132509 | -0.747028 | 1                 | -2.789246 | 1.154474  | -0.733053 |
| 1                                                                                 | 1.615926  | -2.440411 | -1.960610 | 6                 | -3.470432 | -0.713478 | 0.654521  |
| 6                                                                                 | 3.323135  | -1.038818 | -0.311996 | 6                 | -2.921709 | -1.892547 | 0.093161  |
| 6                                                                                 | 3.363995  | -2.212374 | 0.452000  | 1                 | -3.291622 | -2.391397 | -0.790594 |
| 6                                                                                 | 4.439723  | -3.089904 | 0.332498  | 1                 | -3.292157 | -0.619389 | 1.722740  |
| 6                                                                                 | 5.485699  | -2.802462 | -0.544800 | 7                 | -1.776153 | -2.424351 | 0.620526  |
| 6                                                                                 | 5.450952  | -1.633479 | -1.302870 | 8                 | -1.261255 | -1.857350 | 1.638887  |
| 6                                                                                 | 4.374199  | -0.753764 | -1.188847 | 8                 | -1.232735 | -3.426100 | 0.081018  |
| 6                                                                                 | 3.401292  | 3.583027  | -1.190252 | 6                 | -4.843325 | -0.317244 | 0.224836  |
| 6                                                                                 | 1.047363  | 2.722613  | -2.831127 | 6                 | -5.239553 | -0.336893 | -1.123177 |
| 1                                                                                 | 0.695829  | -1.682668 | 0.120580  | 6                 | -6.534971 | 0.015910  | -1.495381 |
| 1                                                                                 | 2.548234  | -2.442307 | 1.156103  | 6                 | -7.464546 | 0.403163  | -0.526615 |
| 1                                                                                 | 4.461386  | -4.010612 | 0.933979  | 6                 | -7.085479 | 0.433162  | 0.815467  |
| 1                                                                                 | 6.334391  | -3.495545 | -0.636245 | 6                 | -5.787025 | 0.079811  | 1.185459  |
| 1                                                                                 | 6.273809  | -1.400787 | -1.994306 | 1                 | -4.527008 | -0.634314 | -1.888942 |
| 1                                                                                 | 4.349133  | 0.167641  | -1.791283 | 1                 | -6.819946 | -0.009739 | -2.543904 |
| 1                                                                                 | 0.782324  | -1.195488 | 2.045053  | 1                 | -5.502654 | 0.092910  | 2.234551  |
| 1                                                                                 | 0.982157  | -0.513321 | 4.394550  | 1                 | -7.800466 | 0.729482  | 1.578336  |
| 1                                                                                 | 2.464518  | 1.390343  | 5.055842  | 1                 | -8.474302 | 0.679654  | -0.817212 |
| 1                                                                                 | 3.765312  | 2.607501  | 3.301582  | 6                 | -2.751803 | 1.938335  | 1.317086  |
| 1                                                                                 | 3.575104  | 1.931193  | 0.914204  | 1                 | -2.389300 | 2.946311  | 1.075910  |
| 1                                                                                 | 4.256084  | 2.875276  | -1.319899 | 1                 | -3.839164 | 2.000895  | 1.425319  |
| 1                                                                                 | 3.463763  | 4.327829  | -2.017440 | 1                 | -2.330314 | 1.657654  | 2.289755  |
| 1                                                                                 | 3.571640  | 4.133428  | -0.236116 | NImag = 1         |           |           |           |
|                                                                                   |           |           |           | Imag. Freq = -339 |           |           |           |

| <b>2a</b>                                                                         |           |           |           |                   |           |           |           |
|-----------------------------------------------------------------------------------|-----------|-----------|-----------|-------------------|-----------|-----------|-----------|
| <b>Et = -843.457219 (-1828.729118)</b>                                            |           |           |           |                   |           |           |           |
| 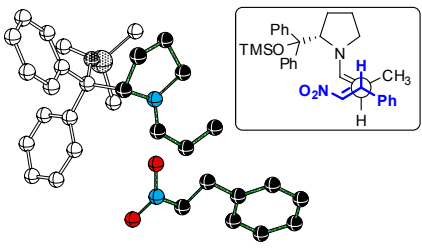 |           |           |           |                   |           |           |           |
| 7                                                                                 | -0.191496 | 0.658726  | -0.962853 | 6                 | 1.053154  | -2.586523 | 2.367211  |
| 6                                                                                 | 1.062637  | -0.129154 | -1.234420 | 6                 | 1.170015  | -1.876137 | 1.170835  |
| 6                                                                                 | 1.450617  | 0.338523  | -2.662960 | 1                 | 0.614728  | -2.263193 | 0.296619  |
| 6                                                                                 | 0.851760  | 1.743602  | -2.792624 | 1                 | 0.400900  | -3.474640 | 2.399144  |
| 6                                                                                 | -0.478604 | 1.616498  | -2.053991 | 1                 | 1.664516  | -2.746215 | 4.439852  |
| 1                                                                                 | 0.764333  | -1.182565 | -1.251491 | 1                 | 3.163641  | -0.748204 | 4.310020  |
| 1                                                                                 | 0.988003  | -0.336602 | -3.391242 | 1                 | 3.379403  | 0.512481  | 2.179356  |
| 1                                                                                 | 2.532370  | 0.327741  | -2.831768 | 6                 | -1.058948 | 0.265300  | -0.035146 |
| 1                                                                                 | 1.493487  | 2.477880  | -2.288139 | 6                 | -2.397963 | 0.674617  | 0.234988  |
| 1                                                                                 | 0.717805  | 2.062036  | -3.830265 | 1                 | -0.659581 | -0.495393 | 0.628226  |
| 1                                                                                 | -0.839333 | 2.563897  | -1.651501 | 1                 | -2.636110 | 0.468100  | 1.276641  |
| 1                                                                                 | -1.253303 | 1.197778  | -2.708612 | 6                 | -2.972033 | 2.006943  | -0.227463 |
| 6                                                                                 | 2.212026  | 0.033613  | -0.200505 | 1                 | -2.351308 | 2.851099  | 0.101078  |
| 8                                                                                 | 2.500779  | 1.388278  | -0.021973 | 1                 | -3.086240 | 2.073275  | -1.313952 |
| 14                                                                                | 1.939896  | 2.661383  | 1.111213  | 1                 | -3.965206 | 2.146300  | 0.205354  |
| 6                                                                                 | 3.414688  | 3.087252  | 2.075847  | 6                 | -3.545097 | -0.796637 | -0.505097 |
| 1                                                                                 | 3.573488  | 4.189805  | 2.127935  | 6                 | -3.232028 | -2.059292 | 0.063133  |
| 1                                                                                 | 4.329654  | 2.646553  | 1.610877  | 1                 | -3.194915 | -0.672337 | -1.526876 |
| 1                                                                                 | 3.363810  | 2.712087  | 3.124176  | 1                 | -3.804077 | -2.539102 | 0.843169  |
| 6                                                                                 | 1.517786  | 4.024902  | -0.008110 | 6                 | -4.932796 | -0.297198 | -0.272726 |
| 1                                                                                 | 2.249631  | 4.091024  | -0.848175 | 6                 | -5.522915 | -0.315855 | 1.002186  |
| 1                                                                                 | 1.528631  | 5.008675  | 0.516964  | 6                 | -6.827889 | 0.135204  | 1.191743  |
| 1                                                                                 | 0.507003  | 3.901857  | -0.461672 | 6                 | -7.570788 | 0.616581  | 0.110610  |
| 6                                                                                 | 0.544555  | 2.229801  | 2.177575  | 6                 | -6.995661 | 0.645216  | -1.160462 |
| 1                                                                                 | 0.729686  | 1.278167  | 2.732326  | 6                 | -5.687365 | 0.197927  | -1.347035 |
| 1                                                                                 | -0.406479 | 2.097350  | 1.607687  | 1                 | -4.953168 | -0.684664 | 1.851202  |
| 1                                                                                 | 0.357817  | 3.021524  | 2.941687  | 1                 | -7.266669 | 0.111214  | 2.185789  |
| 6                                                                                 | 3.456636  | -0.607935 | -0.827176 | 1                 | -8.588306 | 0.967505  | 0.259489  |
| 6                                                                                 | 3.456940  | -1.977234 | -1.123438 | 1                 | -7.564887 | 1.015408  | -2.009099 |
| 6                                                                                 | 4.585759  | -2.574632 | -1.680698 | 1                 | -5.246719 | 0.217932  | -2.341004 |
| 6                                                                                 | 5.725033  | -1.813603 | -1.943384 | 7                 | -2.076351 | -2.700808 | -0.279414 |
| 6                                                                                 | 5.730186  | -0.451690 | -1.646926 | 8                 | -1.304749 | -2.130004 | -1.128959 |
| 6                                                                                 | 4.601116  | 0.150904  | -1.091915 | 8                 | -1.770326 | -3.794036 | 0.253431  |
| 1                                                                                 | 2.566707  | -2.589332 | -0.906816 | NImag = 1         |           |           |           |
| 1                                                                                 | 4.576136  | -3.650517 | -1.909658 | Imag. Freq = -352 |           |           |           |
| 1                                                                                 | 6.615758  | -2.287562 | -2.380441 |                   |           |           |           |
| 1                                                                                 | 6.626540  | 0.152494  | -1.849226 |                   |           |           |           |
| 1                                                                                 | 4.608290  | 1.227337  | -0.860251 |                   |           |           |           |
| 6                                                                                 | 1.975513  | -0.733245 | 1.095251  |                   |           |           |           |
| 6                                                                                 | 2.699731  | -0.354794 | 2.236411  |                   |           |           |           |
| 6                                                                                 | 2.587139  | -1.064913 | 3.428489  |                   |           |           |           |
| 6                                                                                 | 1.755918  | -2.182687 | 3.500049  |                   |           |           |           |

| <b>2f</b> Et= -843.464365 (-1828.727663) |           |           |           |
|------------------------------------------|-----------|-----------|-----------|
|                                          |           |           |           |
| 7                                        | 0.566909  | -0.098763 | 0.710578  |
| 6                                        | -0.662538 | -0.818218 | 0.234510  |
| 6                                        | -0.842110 | -1.880610 | 1.348299  |
| 6                                        | -0.361092 | -1.173911 | 2.624416  |
| 6                                        | 0.840877  | -0.352247 | 2.150331  |
| 1                                        | -0.375637 | -1.280134 | -0.719071 |
| 1                                        | -0.196264 | -2.730730 | 1.106293  |
| 1                                        | -1.876283 | -2.226877 | 1.437077  |
| 1                                        | -1.144275 | -0.507253 | 3.008424  |
| 1                                        | -0.085328 | -1.871567 | 3.419910  |
| 1                                        | 0.949345  | 0.594518  | 2.685518  |
| 1                                        | 1.768517  | -0.918502 | 2.239326  |
| 6                                        | -1.926809 | 0.064322  | -0.007346 |
| 8                                        | -2.534947 | 0.227661  | 1.240073  |
| 14                                       | -4.272820 | 0.347058  | 1.680066  |
| 6                                        | -5.118608 | 1.646912  | 0.746828  |
| 1                                        | -5.588122 | 1.259885  | -0.188078 |
| 1                                        | -4.407363 | 2.453405  | 0.446112  |
| 1                                        | -5.926409 | 2.128209  | 1.346696  |
| 6                                        | -5.072532 | -1.265869 | 1.499219  |
| 1                                        | -6.078364 | -1.188475 | 1.024151  |
| 1                                        | -5.209990 | -1.778262 | 2.479920  |
| 1                                        | -4.459649 | -1.945690 | 0.857477  |
| 6                                        | -4.083826 | 0.807584  | 3.425779  |
| 1                                        | -4.603452 | 0.096813  | 4.109032  |
| 1                                        | -4.481735 | 1.826192  | 3.639640  |
| 1                                        | -3.003037 | 0.807933  | 3.709036  |
| 6                                        | -2.826369 | -0.631438 | -1.025476 |
| 6                                        | -2.818710 | -2.020580 | -1.199236 |
| 6                                        | -3.648151 | -2.624858 | -2.145150 |
| 6                                        | -4.500373 | -1.852555 | -2.931136 |
| 6                                        | -4.518508 | -0.467893 | -2.766582 |
| 6                                        | -3.688456 | 0.136084  | -1.824843 |
| 1                                        | -2.150328 | -2.665593 | -0.606962 |
| 1                                        | -3.619029 | -3.717702 | -2.271759 |
| 1                                        | -5.150608 | -2.330188 | -3.678485 |
| 1                                        | -5.184850 | 0.152287  | -3.384131 |
| 1                                        | -3.710153 | 1.232998  | -1.714935 |
| 6                                        | -1.500897 | 1.419192  | -0.558800 |
| 6                                        | -1.467012 | 2.548908  | 0.265272  |
| 6                                        | -1.078870 | 3.786679  | -0.249020 |
| 6                                        | -0.713821 | 3.906490  | -1.588474 |
| 6                                        | -0.732365 | 2.781230  | -2.413774 |
| 6                                        | -1.121871 | 1.544819  | -1.903336 |
| 1                                        | -1.139297 | 0.659889  | -2.560378 |
| 1                                        | -0.441345 | 2.868438  | -3.471153 |
| 1                                        | -0.410888 | 4.882788  | -1.994071 |
| 1                                        | -1.061265 | 4.668808  | 0.407852  |
| 1                                        | -1.740819 | 2.457869  | 1.328114  |
| 6                                        | 1.377696  | 0.506400  | -0.143802 |
| 6                                        | 2.714332  | 0.963003  | 0.043273  |
| 1                                        | 0.988626  | 0.548743  | -1.156383 |
| 1                                        | 2.991589  | 1.624867  | -0.776719 |
| 6                                        | 3.792880  | -0.615803 | -0.572535 |
| 1                                        | 3.514018  | -0.478199 | -1.613264 |
| 6                                        | 3.320808  | -1.850784 | -0.054348 |
| 1                                        | 3.722269  | -2.375160 | 0.799435  |
| 7                                        | 2.202087  | -2.423604 | -0.594062 |
| 8                                        | 1.635465  | -1.851279 | -1.585381 |
| 8                                        | 1.744497  | -3.490171 | -0.099312 |
| 6                                        | 5.191663  | -0.185883 | -0.280800 |
| 6                                        | 5.878706  | -0.557074 | 0.887070  |
| 6                                        | 7.191105  | -0.142615 | 1.107944  |
| 6                                        | 7.845870  | 0.657454  | 0.168948  |
| 6                                        | 7.175651  | 1.038802  | -0.994472 |
| 6                                        | 5.863160  | 0.622196  | -1.212921 |
| 1                                        | 5.385835  | -1.177636 | 1.629396  |
| 1                                        | 7.704709  | -0.447330 | 2.015916  |
| 1                                        | 8.869261  | 0.978521  | 0.342059  |
| 1                                        | 7.675903  | 1.656448  | -1.735517 |
| 1                                        | 5.349697  | 0.916587  | -2.125514 |
| 6                                        | 3.253717  | 1.463135  | 1.375916  |
| 1                                        | 2.619052  | 2.253220  | 1.796580  |
| 1                                        | 3.351328  | 0.674131  | 2.126235  |
| 1                                        | 4.249436  | 1.887584  | 1.228110  |
| NImag = 1                                |           |           |           |
| Imag. Freq = -316                        |           |           |           |

| <b>3a</b> Et = -843.4636643 (-1828.729916) |                                                                                   |           |           |
|--------------------------------------------|-----------------------------------------------------------------------------------|-----------|-----------|
|                                            | 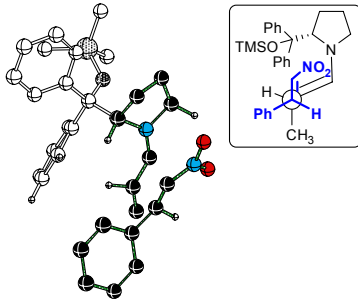 |           |           |
| 7                                          | 0.211717                                                                          | 1.596533  | -0.575812 |
| 6                                          | -0.321192                                                                         | 0.769873  | 0.550165  |
| 6                                          | -0.664937                                                                         | 1.894965  | 1.552312  |
| 6                                          | -1.274415                                                                         | 3.002524  | 0.677303  |
| 6                                          | -0.458727                                                                         | 2.923571  | -0.624940 |
| 1                                          | 0.486074                                                                          | 0.142729  | 0.936984  |
| 1                                          | 0.276708                                                                          | 2.261385  | 1.971805  |
| 1                                          | -1.301133                                                                         | 1.579752  | 2.383535  |
| 1                                          | -2.333828                                                                         | 2.799493  | 0.478084  |
| 1                                          | -1.189260                                                                         | 3.986828  | 1.142300  |
| 1                                          | -1.087076                                                                         | 2.991461  | -1.520270 |
| 1                                          | 0.331923                                                                          | 3.679613  | -0.669987 |
| 6                                          | -1.497791                                                                         | -0.199074 | 0.136757  |
| 8                                          | -2.360144                                                                         | 0.549513  | -0.669541 |
| 14                                         | -4.014926                                                                         | 0.216520  | -1.305480 |
| 6                                          | -4.574678                                                                         | -1.494977 | -1.146149 |
| 1                                          | -3.721878                                                                         | -2.213768 | -1.200575 |
| 1                                          | -5.286707                                                                         | -1.772004 | -1.959340 |
| 1                                          | -5.095881                                                                         | -1.681076 | -0.177926 |
| 6                                          | -5.091606                                                                         | 1.369909  | -0.415492 |
| 1                                          | -5.475370                                                                         | 0.936206  | 0.537441  |
| 1                                          | -5.976936                                                                         | 1.669065  | -1.023969 |
| 1                                          | -4.541854                                                                         | 2.305208  | -0.151722 |
| 6                                          | -3.842745                                                                         | 0.704154  | -3.043952 |
| 1                                          | -2.869729                                                                         | 1.226846  | -3.209550 |
| 1                                          | -4.649222                                                                         | 1.404541  | -3.363742 |
| 1                                          | -3.870759                                                                         | -0.169160 | -3.735867 |
| 6                                          | -2.222784                                                                         | -0.695980 | 1.385393  |
| 6                                          | -3.097596                                                                         | 0.181066  | 2.050604  |
| 6                                          | -3.778731                                                                         | -0.208233 | 3.200395  |
| 6                                          | -3.615435                                                                         | -1.497220 | 3.707199  |
| 6                                          | -2.783784                                                                         | -2.390468 | 3.037594  |
| 6                                          | -2.103821                                                                         | -1.997940 | 1.882818  |
| 1                                          | -3.256741                                                                         | 1.196620  | 1.647687  |
| 1                                          | -4.447227                                                                         | 0.503671  | 3.706950  |
| 1                                          | -4.144650                                                                         | -1.806118 | 4.620234  |
| 1                                          | -2.662629                                                                         | -3.417439 | 3.413573  |
| 1                                          | -1.496557                                                                         | -2.758205 | 1.369271  |
| 6                                          | -0.857395                                                                         | -1.349849 | -0.635812 |
| 6                                          | -1.221772                                                                         | -1.629712 | -1.957305 |
| 6                                          | -0.638414                                                                         | -2.685277 | -2.657798 |
| 6                                          | 0.334243                                                                          | -3.476313 | -2.050886 |
| 6                                          | 0.729627                                                                          | -3.192464 | -0.743745 |
| 6                                          | 0.146313                                                                          | -2.136174 | -0.047118 |
| 1                                          | 0.486622                                                                          | -1.925353 | 0.979922  |
| 1                                          | 1.510305                                                                          | -3.799120 | -0.260899 |
| 1                                          | 0.792906                                                                          | -4.311928 | -2.599004 |
| 1                                          | -0.947198                                                                         | -2.887975 | -3.694049 |
| 1                                          | -1.971566                                                                         | -0.999390 | -2.464583 |
| 6                                          | 1.158183                                                                          | 1.298695  | -1.457728 |
| 6                                          | 2.114751                                                                          | 0.263576  | -1.377705 |
| 1                                          | 1.284406                                                                          | 2.047880  | -2.233255 |
| 1                                          | 1.842116                                                                          | -0.600321 | -0.772304 |
| 6                                          | 2.868835                                                                          | -0.079837 | -2.648142 |
| 1                                          | 3.794659                                                                          | -0.617616 | -2.420099 |
| 1                                          | 2.276651                                                                          | -0.721190 | -3.313331 |
| 1                                          | 3.132328                                                                          | 0.826090  | -3.207065 |
| 6                                          | 3.536155                                                                          | 1.036129  | -0.125312 |
| 6                                          | 2.992720                                                                          | 1.868324  | 0.876974  |
| 1                                          | 2.860549                                                                          | 1.590549  | 1.911800  |
| 1                                          | 4.005522                                                                          | 1.581533  | -0.939656 |
| 6                                          | 4.277099                                                                          | -0.181541 | 0.312814  |
| 6                                          | 3.784587                                                                          | -1.035669 | 1.314189  |
| 6                                          | 4.510447                                                                          | -2.151237 | 1.725839  |
| 6                                          | 5.744757                                                                          | -2.443472 | 1.139638  |
| 6                                          | 6.244279                                                                          | -1.609672 | 0.139267  |
| 6                                          | 5.515431                                                                          | -0.492447 | -0.271138 |
| 1                                          | 2.821874                                                                          | -0.823386 | 1.773539  |
| 1                                          | 4.112626                                                                          | -2.794975 | 2.505799  |
| 1                                          | 6.310003                                                                          | -3.313953 | 1.460575  |
| 1                                          | 7.204264                                                                          | -1.824989 | -0.322155 |
| 1                                          | 5.917363                                                                          | 0.160762  | -1.041460 |
| 7                                          | 2.541820                                                                          | 3.124539  | 0.553587  |
| 8                                          | 2.631127                                                                          | 3.509456  | -0.653769 |
| 8                                          | 2.022002                                                                          | 3.850727  | 1.442979  |

NImag = 1  
 Imag. Freq = -319

| <b>3c</b>                            |           |           |           |                   |           |           |           |
|--------------------------------------|-----------|-----------|-----------|-------------------|-----------|-----------|-----------|
| <b>Et= -843.457674 (1828.724104)</b> |           |           |           |                   |           |           |           |
|                                      |           |           |           |                   |           |           |           |
| 7                                    | 0.583789  | -1.252193 | 0.037509  | 6                 | -1.488781 | 1.239703  | 3.537285  |
| 6                                    | -0.285918 | -0.331109 | -0.760041 | 6                 | -0.818239 | 2.451466  | 3.386513  |
| 6                                    | -0.325632 | -1.129595 | -2.083165 | 6                 | -0.401903 | 2.849152  | 2.116636  |
| 6                                    | -0.450500 | -2.604975 | -1.650876 | 6                 | -0.666705 | 2.050664  | 1.004682  |
| 6                                    | 0.238695  | -2.660001 | -0.264598 | 1                 | -0.294372 | 2.385946  | 0.016609  |
| 1                                    | 0.233173  | 0.623232  | -0.895991 | 1                 | 0.147387  | 3.794296  | 1.983522  |
| 1                                    | 0.633943  | -0.961151 | -2.584985 | 1                 | -0.612211 | 3.084935  | 4.261316  |
| 1                                    | -1.106445 | -0.811078 | -2.777950 | 1                 | -1.807680 | 0.905251  | 4.535258  |
| 1                                    | -1.505301 | -2.883488 | -1.552439 | 1                 | -2.266548 | -0.521839 | 2.570775  |
| 1                                    | 0.011709  | -3.289916 | -2.366921 | 6                 | 1.584316  | -0.934473 | 0.851577  |
| 1                                    | -0.441333 | -3.048174 | 0.504634  | 6                 | 2.194853  | 0.331475  | 1.019094  |
| 1                                    | 1.154572  | -3.257652 | -0.257789 | 1                 | 2.070456  | -1.798523 | 1.303944  |
| 6                                    | -1.671597 | -0.021703 | -0.081117 | 1                 | 1.565225  | 1.182352  | 0.762697  |
| 8                                    | -2.218043 | -1.260233 | 0.280695  | 6                 | 3.022533  | 0.537288  | 2.271962  |
| 14                                   | -3.862232 | -1.717151 | 0.866991  | 1                 | 3.675530  | 1.408327  | 2.144144  |
| 6                                    | -4.930120 | -0.346153 | 1.357884  | 1                 | 2.386301  | 0.731357  | 3.143799  |
| 1                                    | -4.337842 | 0.520092  | 1.740783  | 1                 | 3.651130  | -0.331406 | 2.498201  |
| 1                                    | -5.635230 | -0.642677 | 2.170207  | 6                 | 3.354519  | 0.525454  | -0.526423 |
| 1                                    | -5.548281 | 0.033049  | 0.510455  | 6                 | 3.720270  | 1.894610  | -0.595175 |
| 6                                    | -4.581654 | -2.694031 | -0.481040 | 1                 | 4.671758  | 2.306108  | -0.296828 |
| 1                                    | -5.143176 | -2.059320 | -1.205900 | 1                 | 2.591906  | 0.258379  | -1.255894 |
| 1                                    | -5.289331 | -3.467606 | -0.101034 | 6                 | 4.442473  | -0.495361 | -0.427612 |
| 1                                    | -3.788376 | -3.227315 | -1.057152 | 6                 | 5.623726  | -0.281514 | 0.301152  |
| 6                                    | -3.454578 | -2.795638 | 2.270418  | 6                 | 6.612423  | -1.263292 | 0.367829  |
| 1                                    | -2.360810 | -3.019909 | 2.286239  | 6                 | 6.444242  | -2.481712 | -0.292490 |
| 1                                    | -3.990412 | -3.771752 | 2.216681  | 6                 | 5.277319  | -2.708987 | -1.023998 |
| 1                                    | -3.711038 | -2.332050 | 3.251039  | 6                 | 4.289969  | -1.726241 | -1.086774 |
| 6                                    | -2.565814 | 0.692245  | -1.090736 | 1                 | 5.773968  | 0.659891  | 0.820167  |
| 6                                    | -3.199805 | -0.071229 | -2.086791 | 1                 | 7.519095  | -1.072936 | 0.935876  |
| 6                                    | -4.013313 | 0.522618  | -3.046891 | 1                 | 7.217050  | -3.243698 | -0.242147 |
| 6                                    | -4.222976 | 1.901548  | -3.028629 | 1                 | 5.138914  | -3.648300 | -1.553270 |
| 6                                    | -3.625820 | 2.667377  | -2.031480 | 1                 | 3.390464  | -1.903795 | -1.672828 |
| 6                                    | -2.813209 | 2.068309  | -1.066202 | 7                 | 2.788412  | 2.836256  | -0.971506 |
| 1                                    | -3.059599 | -1.165927 | -2.100884 | 8                 | 1.600915  | 2.461821  | -1.243575 |
| 1                                    | -4.489764 | -0.097742 | -3.820061 | 8                 | 3.129375  | 4.038265  | -1.034928 |
| 1                                    | -4.856163 | 2.376730  | -3.791735 | NImag = 1         |           |           |           |
| 1                                    | -3.790051 | 3.755126  | -1.998581 | Imag. Freq = -352 |           |           |           |
| 1                                    | -2.389344 | 2.717306  | -0.284926 |                   |           |           |           |
| 6                                    | -1.372957 | 0.844370  | 1.138917  |                   |           |           |           |
| 6                                    | -1.756053 | 0.444187  | 2.424012  |                   |           |           |           |

**3e Et = -843.458384(-1828.724264)**

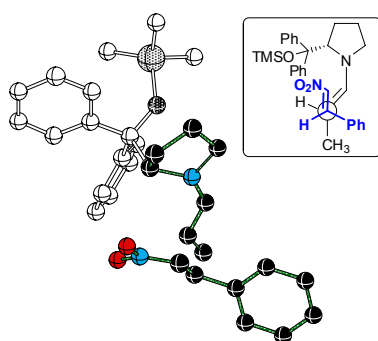

|    |           |           |           |
|----|-----------|-----------|-----------|
| 7  | 0.684555  | -0.285850 | -1.012836 |
| 6  | -0.344874 | 0.700601  | -0.545129 |
| 6  | -0.499668 | 1.534547  | -1.836218 |
| 6  | -0.456653 | 0.501061  | -2.977177 |
| 6  | 0.445686  | -0.630145 | -2.437977 |
| 1  | 0.076388  | 1.313642  | 0.254787  |
| 1  | 0.356922  | 2.212997  | -1.880343 |
| 1  | -1.395018 | 2.160815  | -1.852463 |
| 1  | -1.459934 | 0.108234  | -3.177284 |
| 1  | -0.070419 | 0.923139  | -3.908892 |
| 1  | -0.047874 | -1.608191 | -2.502230 |
| 1  | 1.410254  | -0.691813 | -2.950275 |
| 6  | -1.650842 | 0.031353  | 0.030077  |
| 8  | -2.001286 | -0.983272 | -0.869530 |
| 14 | -3.495071 | -1.977124 | -1.047764 |
| 6  | -4.661223 | -1.875458 | 0.328906  |
| 1  | -4.178698 | -1.445908 | 1.240428  |
| 1  | -5.058286 | -2.878457 | 0.612989  |
| 1  | -5.539471 | -1.229977 | 0.092288  |
| 6  | -4.236463 | -1.442033 | -2.613512 |
| 1  | -4.978619 | -0.622425 | -2.468709 |
| 1  | -4.763925 | -2.278336 | -3.129377 |
| 1  | -3.458098 | -1.060101 | -3.316391 |
| 6  | -2.799057 | -3.645651 | -1.222253 |
| 1  | -1.690235 | -3.595870 | -1.343249 |
| 1  | -3.204468 | -4.176353 | -2.114881 |
| 1  | -3.006074 | -4.287289 | -0.334690 |
| 6  | -2.748928 | 1.086981  | 0.124809  |
| 6  | -3.443889 | 1.447214  | -1.042862 |
| 6  | -4.446485 | 2.412035  | -1.020269 |
| 6  | -4.785983 | 3.038787  | 0.178666  |
| 6  | -4.121778 | 2.677610  | 1.347476  |
| 6  | -3.118673 | 1.706291  | 1.322947  |
| 1  | -3.191535 | 0.952020  | -1.996413 |
| 1  | -4.967569 | 2.681402  | -1.950661 |
| 1  | -5.570413 | 3.808992  | 0.199362  |
| 1  | -4.383638 | 3.159413  | 2.301503  |
| 1  | -2.641116 | 1.442498  | 2.278588  |

|   |           |           |           |
|---|-----------|-----------|-----------|
| 6 | -1.297302 | -0.528344 | 1.406076  |
| 6 | -1.535756 | -1.868722 | 1.728779  |
| 6 | -1.233179 | -2.373281 | 2.993017  |
| 6 | -0.672257 | -1.544010 | 3.961283  |
| 6 | -0.400857 | -0.212936 | 3.646570  |
| 6 | -0.701173 | 0.289177  | 2.381303  |
| 1 | -0.445224 | 1.343511  | 2.162855  |
| 1 | 0.060852  | 0.449647  | 4.394578  |
| 1 | -0.439445 | -1.936161 | 4.961682  |
| 1 | -1.438417 | -3.429317 | 3.221524  |
| 1 | -1.959282 | -2.550649 | 0.973269  |
| 6 | 1.601490  | -0.938247 | -0.308152 |
| 6 | 2.159406  | -0.557311 | 0.929869  |
| 1 | 2.097245  | -1.737457 | -0.859956 |
| 1 | 1.553485  | 0.117353  | 1.533767  |
| 6 | 2.885998  | -1.625669 | 1.725692  |
| 1 | 3.581125  | -1.174098 | 2.442146  |
| 1 | 2.180992  | -2.238394 | 2.300993  |
| 1 | 3.465298  | -2.294039 | 1.079168  |
| 6 | 3.493253  | 0.822438  | 0.478445  |
| 6 | 2.948040  | 1.900862  | -0.262640 |
| 1 | 3.201914  | 2.126372  | -1.287217 |
| 1 | 3.595273  | 1.034637  | 1.542132  |
| 6 | 4.680067  | 0.138932  | -0.117186 |
| 6 | 5.806222  | -0.133863 | 0.674162  |
| 6 | 6.932177  | -0.756756 | 0.134074  |
| 6 | 6.952402  | -1.124884 | -1.211277 |
| 6 | 5.838421  | -0.861808 | -2.012445 |
| 6 | 4.715913  | -0.239035 | -1.469932 |
| 1 | 5.803645  | 0.159520  | 1.720815  |
| 1 | 7.794371  | -0.951552 | 0.766130  |
| 1 | 7.827282  | -1.611302 | -1.633535 |
| 1 | 5.844650  | -1.142634 | -3.062461 |
| 1 | 3.856343  | -0.035161 | -2.104005 |
| 7 | 2.020828  | 2.746412  | 0.291908  |
| 8 | 1.596190  | 2.516835  | 1.468815  |
| 8 | 1.573949  | 3.698774  | -0.396972 |

NImag = 1

Imag. Freq = -302



**3f Et = -843.4565765 (-1828.723583)**

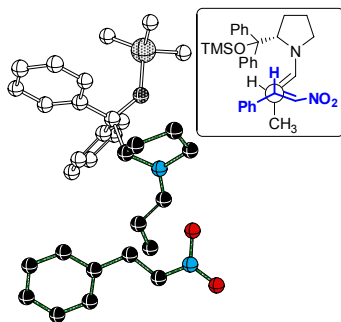

|    |           |           |           |
|----|-----------|-----------|-----------|
| 7  | 0.223621  | -1.630908 | 0.038938  |
| 6  | -0.341855 | -0.485253 | -0.723181 |
| 6  | -0.489595 | -1.159467 | -2.107565 |
| 6  | -1.021770 | -2.567803 | -1.786813 |
| 6  | -0.388471 | -2.903585 | -0.415530 |
| 1  | 0.397617  | 0.319705  | -0.759301 |
| 1  | 0.519919  | -1.240705 | -2.524856 |
| 1  | -1.099977 | -0.605444 | -2.825278 |
| 1  | -2.115094 | -2.552024 | -1.708809 |
| 1  | -0.744267 | -3.298139 | -2.550589 |
| 1  | -1.143193 | -3.233542 | 0.308495  |
| 1  | 0.407905  | -3.646646 | -0.489688 |
| 6  | -1.637554 | 0.127354  | -0.070932 |
| 8  | -2.515264 | -0.938818 | 0.143095  |
| 14 | -4.248847 | -0.979847 | 0.641976  |
| 6  | -4.905647 | 0.575964  | 1.285063  |
| 1  | -4.124448 | 1.158367  | 1.830544  |
| 1  | -5.743075 | 0.403316  | 2.002056  |
| 1  | -5.298766 | 1.235982  | 0.476637  |
| 6  | -5.135447 | -1.536253 | -0.836503 |
| 1  | -5.422953 | -0.686245 | -1.498532 |
| 1  | -6.069823 | -2.088743 | -0.581238 |
| 1  | -4.500735 | -2.224747 | -1.444537 |
| 6  | -4.225082 | -2.276667 | 1.909454  |
| 1  | -3.242036 | -2.807499 | 1.905253  |
| 1  | -5.013659 | -3.045874 | 1.737465  |
| 1  | -4.377555 | -1.871862 | 2.936610  |
| 6  | -2.251243 | 1.149003  | -1.023186 |
| 6  | -2.939441 | 0.683065  | -2.156809 |
| 6  | -3.502439 | 1.565507  | -3.074542 |
| 6  | -3.408906 | 2.941775  | -2.869127 |
| 6  | -2.770678 | 3.417568  | -1.726861 |
| 6  | -2.208156 | 2.530297  | -0.807134 |
| 1  | -3.054743 | -0.403876 | -2.312399 |

|   |           |           |           |
|---|-----------|-----------|-----------|
| 1 | -4.024689 | 1.173879  | -3.960077 |
| 1 | -3.844479 | 3.642430  | -3.596189 |
| 1 | -2.712603 | 4.500249  | -1.539181 |
| 1 | -1.758396 | 2.956210  | 0.102396  |
| 6 | -1.179590 | 0.759510  | 1.241235  |
| 6 | -1.671976 | 0.312202  | 2.472083  |
| 6 | -1.234735 | 0.876414  | 3.670104  |
| 6 | -0.283151 | 1.893784  | 3.659389  |
| 6 | 0.237152  | 2.332166  | 2.441876  |
| 6 | -0.200160 | 1.765160  | 1.246555  |
| 1 | 0.236416  | 2.120852  | 0.298954  |
| 1 | 1.002116  | 3.122857  | 2.422172  |
| 1 | 0.061566  | 2.342099  | 4.602448  |
| 1 | -1.640731 | 0.510540  | 4.624888  |
| 1 | -2.405905 | -0.510919 | 2.501890  |
| 6 | 1.327400  | -1.645369 | 0.777778  |
| 6 | 2.225053  | -0.587453 | 1.065409  |
| 1 | 1.583772  | -2.633926 | 1.145000  |
| 1 | 1.820492  | 0.419499  | 0.963622  |
| 6 | 3.116507  | -0.778849 | 2.277602  |
| 1 | 3.891808  | -0.007331 | 2.311654  |
| 1 | 2.551697  | -0.718222 | 3.216565  |
| 1 | 3.614556  | -1.754643 | 2.245593  |
| 6 | 3.474338  | -0.549272 | -0.529781 |
| 6 | 4.374665  | -1.637627 | -0.506961 |
| 1 | 5.410337  | -1.591842 | -0.208041 |
| 1 | 2.667800  | -0.669991 | -1.248180 |
| 6 | 4.023964  | 0.837289  | -0.484327 |
| 6 | 3.353506  | 1.863454  | -1.170727 |
| 6 | 3.833937  | 3.171972  | -1.166698 |
| 6 | 4.999463  | 3.486383  | -0.465804 |
| 6 | 5.677012  | 2.479841  | 0.224794  |
| 6 | 5.195369  | 1.171165  | 0.216853  |
| 1 | 2.450955  | 1.625076  | -1.730378 |
| 1 | 3.301845  | 3.944060  | -1.716155 |
| 1 | 5.378157  | 4.504632  | -0.460632 |
| 1 | 6.587733  | 2.712393  | 0.770193  |
| 1 | 5.739479  | 0.401304  | 0.755279  |
| 7 | 3.918175  | -2.904301 | -0.780263 |
| 8 | 2.674913  | -3.051290 | -1.032387 |
| 8 | 4.709027  | -3.873712 | -0.760249 |

NImag = 1  
 Imag. Freq = -333



## II. Michael addition between iminium and nitroalkane anion

| 4b (NImag = 1, Imag. Freq = -178<br>Et = -1266.465070 (-2251.733881)) |           |           |           |
|-----------------------------------------------------------------------|-----------|-----------|-----------|
|                                                                       |           |           |           |
| 6                                                                     | -3.529060 | 0.751523  | -2.366243 |
| 6                                                                     | -3.705659 | -0.659176 | -1.854633 |
| 6                                                                     | -4.103323 | -0.642047 | -0.343766 |
| 6                                                                     | -4.806478 | -1.276106 | -2.750267 |
| 1                                                                     | -2.767600 | -1.197077 | -1.990018 |
| 6                                                                     | -3.009847 | -0.326315 | 0.675047  |
| 1                                                                     | -4.823344 | 0.181352  | -0.224431 |
| 6                                                                     | -4.845280 | -1.908766 | 0.101601  |
| 6                                                                     | -1.793790 | 1.600356  | 0.605895  |
| 1                                                                     | -3.397041 | -0.116652 | 1.665763  |
| 7                                                                     | -1.853821 | -1.084873 | 0.772613  |
| 6                                                                     | -0.835655 | 1.520297  | -0.422148 |
| 6                                                                     | -2.845893 | 2.635820  | 0.666830  |
| 1                                                                     | -1.480605 | 1.220858  | 1.575991  |
| 6                                                                     | 0.265888  | 0.680813  | -0.280478 |
| 1                                                                     | -4.970215 | -2.324696 | -2.491512 |
| 1                                                                     | -5.763400 | -0.751236 | -2.636894 |
| 1                                                                     | -4.511832 | -1.222638 | -3.804111 |
| 6                                                                     | -6.170593 | -1.823127 | 0.546491  |
| 6                                                                     | -6.863360 | -2.958808 | 0.972216  |
| 6                                                                     | -6.237402 | -4.204538 | 0.956884  |
| 6                                                                     | -4.914677 | -4.303066 | 0.516986  |
| 6                                                                     | -4.222728 | -3.168236 | 0.095766  |
| 1                                                                     | -6.667753 | -0.855218 | 0.562065  |
| 1                                                                     | -7.891053 | -2.866883 | 1.314578  |
| 1                                                                     | -6.772662 | -5.091212 | 1.286150  |
| 1                                                                     | -4.416503 | -5.269144 | 0.504451  |
| 1                                                                     | -3.191140 | -3.253881 | -0.231867 |
| 8                                                                     | -1.345248 | -1.605036 | -0.262074 |
| 8                                                                     | -1.222155 | -1.077171 | 1.864042  |
| 6                                                                     | -3.507190 | 2.852649  | 1.891092  |
| 6                                                                     | -4.483214 | 3.836922  | 2.021031  |
| 6                                                                     | -4.824750 | 4.632209  | 0.924527  |
| 6                                                                     | -4.177660 | 4.432988  | -0.296745 |
| 6                                                                     | -3.198754 | 3.448757  | -0.426785 |
| 1                                                                     | -3.239863 | 2.242098  | 2.750405  |
| 1                                                                     | -4.974126 | 3.986849  | 2.978882  |
| 1                                                                     | -5.585195 | 5.402230  | 1.021976  |
| 1                                                                     | -4.432648 | 5.049996  | -1.154367 |
| 1                                                                     | -2.711727 | 3.313233  | -1.386917 |
| 1                                                                     | 0.434803  | 0.231119  | 0.695611  |
| 7                                                                     | 1.162060  | 0.362224  | -1.220731 |
| 6                                                                     | 2.196098  | -0.699654 | -1.016012 |
| 6                                                                     | 2.712632  | -0.956449 | -2.455662 |
| 6                                                                     | 1.522124  | -0.602313 | -3.351295 |
| 6                                                                     | 0.922599  | 0.622276  | -2.656100 |
| 1                                                                     | 3.563519  | -0.292764 | -2.664175 |
| 1                                                                     | 3.058796  | -1.987883 | -2.573253 |
| 1                                                                     | 1.808293  | -0.395832 | -4.386795 |
| 1                                                                     | 0.789794  | -1.417393 | -3.354865 |
| 1                                                                     | 1.430864  | 1.548715  | -2.961463 |
| 1                                                                     | -0.148503 | 0.729838  | -2.840212 |
| 1                                                                     | 1.673800  | -1.589151 | -0.636396 |
| 6                                                                     | 3.380837  | -0.386925 | -0.066357 |
| 8                                                                     | 4.055667  | 0.757022  | -0.496839 |
| 14                                                                    | 3.804563  | 2.520916  | -0.278074 |
| 6                                                                     | 3.538072  | 3.125269  | -1.966546 |
| 1                                                                     | 3.719518  | 2.308802  | -2.706872 |
| 1                                                                     | 2.497694  | 3.492016  | -2.126637 |
| 1                                                                     | 4.227317  | 3.962351  | -2.225997 |
| 6                                                                     | 2.469055  | 3.018639  | 0.832155  |
| 1                                                                     | 1.457457  | 2.812478  | 0.407075  |
| 1                                                                     | 2.528019  | 2.482715  | 1.810442  |
| 1                                                                     | 2.511381  | 4.111379  | 1.054596  |
| 6                                                                     | 5.419019  | 3.039996  | 0.364717  |
| 1                                                                     | 5.816439  | 3.938551  | -0.161531 |
| 1                                                                     | 5.382508  | 3.280973  | 1.452281  |
| 1                                                                     | 6.168485  | 2.222033  | 0.233708  |
| 6                                                                     | 4.359273  | -1.558469 | -0.236811 |
| 6                                                                     | 5.631667  | -1.358929 | -0.781332 |
| 6                                                                     | 6.511644  | -2.432522 | -0.920202 |
| 6                                                                     | 6.128555  | -3.710993 | -0.518470 |
| 6                                                                     | 4.861118  | -3.914039 | 0.027990  |
| 6                                                                     | 3.980539  | -2.843775 | 0.171406  |
| 1                                                                     | 5.936420  | -0.349373 | -1.099217 |
| 1                                                                     | 7.511185  | -2.266095 | -1.347575 |
| 1                                                                     | 6.822997  | -4.556305 | -0.628580 |
| 1                                                                     | 4.555039  | -4.919727 | 0.351327  |
| 1                                                                     | 2.988297  | -3.009008 | 0.620373  |
| 6                                                                     | 3.020757  | -0.357785 | 1.410298  |
| 6                                                                     | 1.923718  | -1.043290 | 1.942728  |
| 6                                                                     | 1.679327  | -1.032455 | 3.317597  |
| 6                                                                     | 2.543608  | -0.365839 | 4.182709  |
| 6                                                                     | 3.657883  | 0.295680  | 3.665709  |
| 6                                                                     | 3.893825  | 0.296891  | 2.293910  |
| 1                                                                     | 1.213933  | -1.600540 | 1.305712  |
| 1                                                                     | 0.784146  | -1.548006 | 3.701287  |
| 1                                                                     | 2.351581  | -0.363554 | 5.265282  |
| 1                                                                     | 4.354884  | 0.813100  | 4.340978  |
| 1                                                                     | 4.781003  | 0.812786  | 1.888612  |
| 1                                                                     | -1.005742 | 2.027170  | -1.363074 |
| 1                                                                     | -4.375372 | 1.433842  | -2.121634 |
| 8                                                                     | -2.603385 | 1.157776  | -3.040341 |

**4c** (NImag = 1, Imag. Freq = -156)  
**Et= -1266.458611(-2251.727244)**

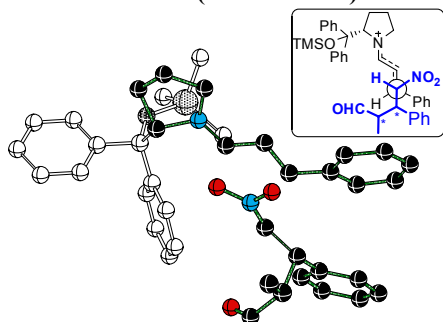

|   |           |           |           |
|---|-----------|-----------|-----------|
| 6 | -3.362686 | -3.823801 | -0.510222 |
| 6 | -4.073593 | -2.708948 | -1.252344 |
| 6 | -3.750861 | -1.252893 | -0.759316 |
| 6 | -3.854030 | -2.948345 | -2.765300 |
| 1 | -5.146441 | -2.876199 | -1.062004 |
| 6 | -2.289161 | -0.898715 | -0.836092 |
| 1 | -4.275122 | -0.588971 | -1.455342 |
| 6 | -4.364907 | -1.048446 | 0.626845  |
| 6 | -1.849165 | 1.370970  | -0.098210 |
| 6 | -0.722398 | 1.732369  | -0.846700 |
| 6 | -3.134373 | 2.065338  | -0.271786 |
| 1 | -1.691603 | 0.905239  | 0.870475  |
| 6 | 0.492444  | 1.085345  | -0.635482 |
| 1 | -4.406139 | -2.207981 | -3.349366 |
| 1 | -2.800370 | -2.867368 | -3.042642 |
| 1 | -4.207902 | -3.947618 | -3.047550 |
| 6 | -5.703267 | -0.638520 | 0.715665  |
| 6 | -6.332343 | -0.474164 | 1.949405  |
| 6 | -5.627371 | -0.711977 | 3.130537  |
| 6 | -4.295331 | -1.121436 | 3.059474  |
| 6 | -3.672063 | -1.293933 | 1.821127  |
| 1 | -6.255546 | -0.429248 | -0.198046 |
| 1 | -7.369501 | -0.150493 | 1.986863  |
| 1 | -6.111291 | -0.582091 | 4.095107  |
| 1 | -3.736676 | -1.317432 | 3.971428  |
| 1 | -2.645871 | -1.642978 | 1.789225  |
| 6 | -3.916512 | 2.379372  | 0.853227  |
| 6 | -5.092633 | 3.114276  | 0.721360  |
| 6 | -5.521345 | 3.528662  | -0.541367 |
| 6 | -4.768384 | 3.196892  | -1.671289 |
| 6 | -3.583846 | 2.475514  | -1.542099 |
| 1 | -3.594528 | 2.046314  | 1.836305  |
| 1 | -5.678236 | 3.355712  | 1.604256  |
| 1 | -6.441146 | 4.098243  | -0.646127 |
| 1 | -5.108016 | 3.497863  | -2.658940 |
| 1 | -3.024111 | 2.179831  | -2.423416 |
| 1 | 0.552597  | 0.404128  | 0.211224  |
| 7 | 1.628423  | 1.255073  | -1.316304 |
| 6 | 2.782880  | 0.308370  | -1.280483 |
| 6 | 3.795930  | 1.019839  | -2.201115 |

|    |           |           |           |
|----|-----------|-----------|-----------|
| 6  | 2.911254  | 1.606655  | -3.307775 |
| 6  | 1.629107  | 2.030836  | -2.573749 |
| 1  | 4.308869  | 1.811822  | -1.639219 |
| 1  | 4.555520  | 0.326497  | -2.575753 |
| 1  | 3.381110  | 2.441546  | -3.835092 |
| 1  | 2.675690  | 0.834152  | -4.047366 |
| 1  | 1.614230  | 3.102362  | -2.337998 |
| 1  | 0.725978  | 1.782622  | -3.142499 |
| 1  | 2.455739  | -0.629052 | -1.757404 |
| 6  | 3.407423  | -0.058098 | 0.085938  |
| 8  | 3.897983  | 1.071491  | 0.740638  |
| 14 | 3.171772  | 2.428768  | 1.662160  |
| 6  | 3.237683  | 3.857358  | 0.552611  |
| 1  | 4.094079  | 3.766826  | -0.158071 |
| 1  | 2.313315  | 3.960999  | -0.062203 |
| 1  | 3.372458  | 4.813593  | 1.110444  |
| 6  | 1.500471  | 2.133335  | 2.286911  |
| 1  | 0.710133  | 2.418729  | 1.552655  |
| 1  | 1.345735  | 1.055552  | 2.538217  |
| 1  | 1.305195  | 2.715844  | 3.218588  |
| 6  | 4.366540  | 2.580615  | 3.015387  |
| 1  | 5.234690  | 1.899222  | 2.839667  |
| 1  | 4.773058  | 3.614102  | 3.109658  |
| 1  | 3.926844  | 2.305234  | 4.001744  |
| 6  | 4.631681  | -0.923290 | -0.253454 |
| 6  | 5.928011  | -0.476315 | 0.018972  |
| 6  | 7.025773  | -1.280244 | -0.289416 |
| 6  | 6.837527  | -2.532843 | -0.870975 |
| 6  | 5.545150  | -2.984441 | -1.139976 |
| 6  | 4.445908  | -2.186254 | -0.830335 |
| 1  | 6.078527  | 0.512168  | 0.480888  |
| 1  | 8.042213  | -0.922031 | -0.070264 |
| 1  | 7.703707  | -3.165117 | -1.113973 |
| 1  | 5.390458  | -3.974556 | -1.593276 |
| 1  | 3.427080  | -2.557045 | -1.026395 |
| 6  | 2.521742  | -0.925883 | 0.968445  |
| 6  | 1.450582  | -1.679499 | 0.471853  |
| 6  | 0.712066  | -2.506743 | 1.320310  |
| 6  | 1.052385  | -2.615247 | 2.667433  |
| 6  | 2.136102  | -1.892106 | 3.165596  |
| 6  | 2.866890  | -1.058924 | 2.322280  |
| 1  | 1.150770  | -1.629893 | -0.591188 |
| 1  | -0.147572 | -3.071158 | 0.917292  |
| 1  | 0.472654  | -3.272897 | 3.331604  |
| 1  | 2.421331  | -1.984466 | 4.223850  |
| 1  | 3.738217  | -0.509092 | 2.713524  |
| 1  | -0.840895 | 2.405444  | -1.687791 |
| 1  | -3.764059 | -4.836350 | -0.753315 |
| 8  | -2.424319 | -3.719147 | 0.252393  |
| 1  | -1.591342 | -1.385367 | -0.169960 |
| 7  | -1.713845 | -0.642965 | -2.056674 |
| 8  | -0.447412 | -0.735459 | -2.127993 |
| 8  | -2.391297 | -0.199666 | -3.024106 |

**4d**

**Et = -1266.460918(-2251.730417)**

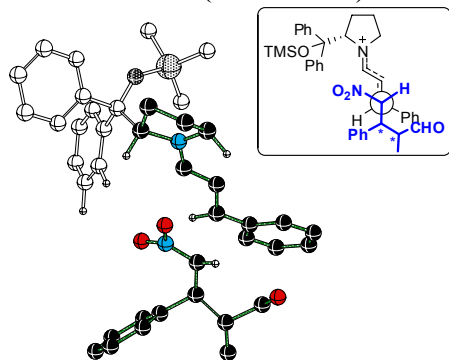

|    |           |           |           |
|----|-----------|-----------|-----------|
| 6  | 4.362128  | 2.735216  | 1.437373  |
| 6  | 4.151133  | 2.278145  | 0.132236  |
| 6  | 4.037543  | 3.225124  | -0.894776 |
| 6  | 4.127085  | 4.589272  | -0.622087 |
| 6  | 4.338115  | 5.033242  | 0.685173  |
| 6  | 4.454974  | 4.099947  | 1.715205  |
| 6  | 4.115861  | 0.779033  | -0.169190 |
| 6  | 5.409963  | 0.394981  | -0.981584 |
| 1  | 5.389184  | 0.960792  | -1.920126 |
| 6  | 2.884618  | 0.316625  | -0.933366 |
| 7  | 1.700854  | 1.023762  | -0.842066 |
| 8  | 1.394979  | 1.614583  | 0.228840  |
| 8  | 0.867642  | 0.894682  | -1.783589 |
| 6  | 5.422067  | -1.071956 | -1.368028 |
| 8  | 5.148835  | -1.492973 | -2.473659 |
| 6  | 1.865169  | -1.417080 | 0.183073  |
| 6  | 2.944408  | -2.386164 | 0.448734  |
| 6  | 3.632437  | -2.322871 | 1.674953  |
| 6  | 4.626851  | -3.248871 | 1.991002  |
| 6  | 4.957104  | -4.256641 | 1.083603  |
| 6  | 4.285715  | -4.329534 | -0.141293 |
| 6  | 3.292544  | -3.406817 | -0.455595 |
| 6  | 0.724966  | -1.762945 | -0.563577 |
| 6  | -0.397356 | -0.936958 | -0.554535 |
| 7  | -1.510934 | -1.068524 | -1.287141 |
| 6  | -2.556166 | 0.001404  | -1.341499 |
| 6  | -3.396611 | -0.404277 | -2.579664 |
| 6  | -2.404984 | -1.146841 | -3.479883 |
| 6  | -1.563836 | -1.939609 | -2.476199 |
| 6  | -3.471928 | 0.182933  | -0.104129 |
| 6  | -2.793333 | 0.816612  | 1.099677  |
| 6  | -1.663671 | 1.635225  | 0.996504  |
| 6  | -1.119975 | 2.241169  | 2.131208  |
| 6  | -1.715792 | 2.066242  | 3.377882  |
| 6  | -2.861100 | 1.277016  | 3.487613  |
| 6  | -3.394379 | 0.660882  | 2.359116  |
| 8  | -4.127021 | -1.013850 | 0.193455  |
| 14 | -3.678104 | -2.494450 | 1.102857  |
| 6  | -5.062285 | -2.637909 | 2.265594  |
| 6  | -4.558758 | 1.174990  | -0.543745 |

|   |           |           |           |
|---|-----------|-----------|-----------|
| 6 | -5.898558 | 0.783569  | -0.627091 |
| 6 | -6.874309 | 1.700683  | -1.018331 |
| 6 | -6.520548 | 3.012373  | -1.329701 |
| 6 | -5.185383 | 3.407912  | -1.244981 |
| 6 | -4.208295 | 2.495847  | -0.851437 |
| 6 | -3.729401 | -3.801764 | -0.153248 |
| 6 | -2.094830 | -2.463969 | 1.973307  |
| 1 | 1.730745  | -0.661812 | 0.955718  |
| 1 | 3.363418  | -1.553166 | 2.394124  |
| 1 | 5.138421  | -3.185555 | 2.947757  |
| 1 | 5.731850  | -4.978995 | 1.325725  |
| 1 | 4.546279  | -5.102305 | -0.859158 |
| 1 | 2.807971  | -3.455898 | -1.425603 |
| 1 | -0.408519 | -0.119326 | 0.161522  |
| 1 | -4.211760 | -1.072406 | -2.268123 |
| 1 | -3.847780 | 0.471510  | -3.055789 |
| 1 | -2.891539 | -1.790783 | -4.218460 |
| 1 | -1.765573 | -0.435022 | -4.013504 |
| 1 | -2.033005 | -2.901514 | -2.222923 |
| 1 | -0.550035 | -2.131428 | -2.836137 |
| 1 | -2.036255 | 0.950887  | -1.530023 |
| 1 | -4.136622 | -3.403977 | -1.114190 |
| 1 | -2.719751 | -4.221422 | -0.369595 |
| 1 | -4.382400 | -4.651953 | 0.153008  |
| 1 | -1.985277 | -1.539689 | 2.590991  |
| 1 | -1.994122 | -3.333921 | 2.664867  |
| 1 | -1.221951 | -2.497941 | 1.278227  |
| 1 | -5.891340 | -1.951716 | 1.965964  |
| 1 | -5.483727 | -3.669153 | 2.299378  |
| 1 | -4.769408 | -2.364318 | 3.305594  |
| 1 | -6.180223 | -0.252329 | -0.380793 |
| 1 | -7.925969 | 1.384874  | -1.079028 |
| 1 | -7.290549 | 3.734211  | -1.637893 |
| 1 | -4.900946 | 4.442993  | -1.484507 |
| 1 | -3.158805 | 2.820448  | -0.769142 |
| 1 | -1.158068 | 1.820788  | 0.031735  |
| 1 | -0.204346 | 2.845268  | 2.021719  |
| 1 | -1.289214 | 2.549310  | 4.268662  |
| 1 | -3.348098 | 1.144176  | 4.464688  |
| 1 | -4.305622 | 0.045126  | 2.447097  |
| 1 | 0.746437  | -2.647678 | -1.191122 |
| 1 | 3.015124  | -0.106039 | -1.921594 |
| 1 | 4.171852  | 0.254423  | 0.796098  |
| 1 | 3.861550  | 2.894228  | -1.915754 |
| 1 | 4.029578  | 5.307215  | -1.432493 |
| 1 | 4.408196  | 6.096727  | 0.897927  |
| 1 | 4.615488  | 4.432113  | 2.737808  |
| 1 | 4.446408  | 2.014250  | 2.247560  |
| 6 | 6.699944  | 0.707724  | -0.205619 |
| 1 | 5.722627  | -1.770152 | -0.557462 |
| 1 | 7.583677  | 0.455455  | -0.802859 |
| 1 | 6.755009  | 1.768031  | 0.052054  |
| 1 | 6.748848  | 0.130017  | 0.725956  |

NImag = 1

Imag. Freq = -224

**4e** (NImag = 1, Imag. Freq = -213)  
**Et = -1266.461802 (-2251.729973)**

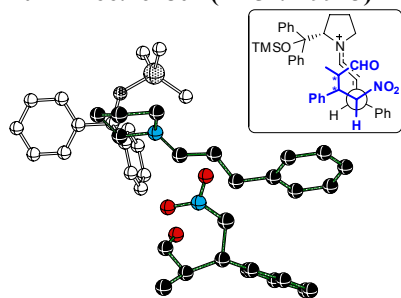

|   |           |           |           |
|---|-----------|-----------|-----------|
| 6 | -1.499740 | -2.852858 | -0.030704 |
| 6 | -2.894362 | -3.170210 | -0.549080 |
| 6 | -3.808792 | -1.934656 | -0.851757 |
| 6 | -2.824949 | -4.144123 | -1.736004 |
| 1 | -3.381474 | -3.701141 | 0.282677  |
| 6 | -3.191465 | -0.686617 | -1.491713 |
| 1 | -4.501741 | -2.313135 | -1.620701 |
| 6 | -4.724593 | -1.537158 | 0.312408  |
| 6 | -2.213031 | 0.897114  | -0.162156 |
| 6 | -0.995663 | 1.220104  | -0.791339 |
| 6 | -3.309203 | 1.889673  | -0.124917 |
| 1 | -2.173449 | 0.192019  | 0.662253  |
| 6 | 0.133467  | 0.424469  | -0.620933 |
| 1 | -3.828486 | -4.479419 | -2.019796 |
| 1 | -2.351929 | -3.672264 | -2.600946 |
| 1 | -2.242105 | -5.035867 | -1.475206 |
| 6 | -6.041779 | -1.147615 | 0.031936  |
| 6 | -6.924177 | -0.792761 | 1.052675  |
| 6 | -6.504980 | -0.832403 | 2.383109  |
| 6 | -5.197376 | -1.221703 | 2.677073  |
| 6 | -4.312438 | -1.566161 | 1.652507  |
| 1 | -6.384862 | -1.127577 | -1.000777 |
| 1 | -7.940685 | -0.495777 | 0.807804  |
| 1 | -7.192266 | -0.568283 | 3.182648  |
| 1 | -4.860209 | -1.260478 | 3.710107  |
| 1 | -3.292885 | -1.852928 | 1.889501  |
| 6 | -4.074119 | 2.046059  | 1.042140  |
| 6 | -5.071715 | 3.017353  | 1.117249  |
| 6 | -5.333544 | 3.841439  | 0.021862  |
| 6 | -4.593596 | 3.682166  | -1.153352 |
| 6 | -3.591136 | 2.718453  | -1.227627 |
| 1 | -3.884122 | 1.400159  | 1.893858  |
| 1 | -5.648131 | 3.125290  | 2.032171  |
| 1 | -6.113697 | 4.596001  | 0.078470  |
| 1 | -4.802270 | 4.308335  | -2.017021 |
| 1 | -3.043822 | 2.574580  | -2.154758 |
| 1 | 0.118776  | -0.323322 | 0.168494  |
| 7 | 1.271653  | 0.515622  | -1.320546 |
| 6 | 2.437020  | -0.388867 | -1.088994 |
| 6 | 3.223791  | -0.294175 | -2.425392 |

|    |           |           |           |
|----|-----------|-----------|-----------|
| 6  | 2.166824  | 0.105093  | -3.458954 |
| 6  | 1.287757  | 1.088782  | -2.684318 |
| 1  | 3.995460  | 0.484173  | -2.343211 |
| 1  | 3.728385  | -1.237956 | -2.653889 |
| 1  | 2.595595  | 0.545991  | -4.363820 |
| 1  | 1.557085  | -0.758534 | -3.746481 |
| 1  | 1.714646  | 2.101818  | -2.678391 |
| 1  | 0.263846  | 1.119218  | -3.062399 |
| 1  | 2.049825  | -1.408465 | -0.953432 |
| 6  | 3.365936  | -0.061699 | 0.110191  |
| 8  | 3.876496  | 1.231708  | -0.014152 |
| 14 | 3.277568  | 2.868999  | 0.419958  |
| 6  | 3.277288  | 3.746480  | -1.166199 |
| 1  | 3.730089  | 3.110734  | -1.965237 |
| 1  | 2.249535  | 4.019059  | -1.500899 |
| 1  | 3.870937  | 4.689341  | -1.122615 |
| 6  | 1.673106  | 2.955105  | 1.243915  |
| 1  | 0.830374  | 2.643192  | 0.580511  |
| 1  | 1.638356  | 2.297334  | 2.145733  |
| 1  | 1.447815  | 3.992934  | 1.587059  |
| 6  | 4.601998  | 3.479958  | 1.499741  |
| 1  | 5.505038  | 2.828228  | 1.415013  |
| 1  | 4.917858  | 4.515540  | 1.234265  |
| 1  | 4.302212  | 3.489999  | 2.573108  |
| 6  | 4.561443  | -1.015518 | -0.025077 |
| 6  | 5.842696  | -0.525527 | -0.297649 |
| 6  | 6.920832  | -1.403513 | -0.410766 |
| 6  | 6.728908  | -2.775252 | -0.254939 |
| 6  | 5.453066  | -3.268546 | 0.018656  |
| 6  | 4.374507  | -2.394151 | 0.135605  |
| 1  | 5.996426  | 0.558057  | -0.422449 |
| 1  | 7.925105  | -1.008793 | -0.623409 |
| 1  | 7.579422  | -3.466269 | -0.344855 |
| 1  | 5.296286  | -4.349546 | 0.146424  |
| 1  | 3.374059  | -2.790632 | 0.368160  |
| 6  | 2.757904  | -0.340243 | 1.475793  |
| 6  | 1.738312  | -1.274846 | 1.681606  |
| 6  | 1.253187  | -1.528199 | 2.965963  |
| 6  | 1.801108  | -0.876631 | 4.068169  |
| 6  | 2.841891  | 0.032946  | 3.879476  |
| 6  | 3.315209  | 0.295255  | 2.596934  |
| 1  | 1.290534  | -1.838195 | 0.846534  |
| 1  | 0.424201  | -2.242194 | 3.091873  |
| 1  | 1.419940  | -1.080371 | 5.079111  |
| 1  | 3.293603  | 0.541487  | 4.743873  |
| 1  | 4.144363  | 1.009195  | 2.452177  |
| 1  | -0.960867 | 2.056614  | -1.478763 |
| 1  | -0.683715 | -3.439181 | -0.496811 |
| 8  | -1.257469 | -2.123732 | 0.917806  |
| 7  | -2.107842 | -0.758506 | -2.340120 |
| 8  | -1.176358 | -1.598111 | -2.118973 |
| 8  | -1.939517 | 0.157316  | -3.183727 |
| 1  | -3.928450 | 0.005680  | -1.879170 |

### III. Intramolecular cyclization

5a<sup>a</sup> Et = -2238.632504<sup>b</sup> (-2251.7305475)

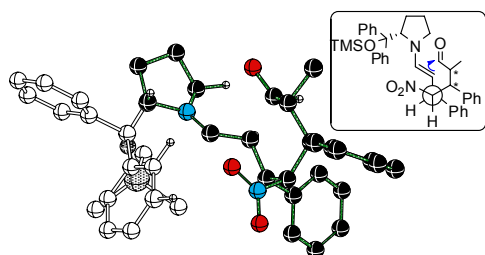

|    |           |           |           |
|----|-----------|-----------|-----------|
| 6  | -3.120340 | 0.065854  | 0.578327  |
| 6  | -2.037999 | 1.141493  | 0.265325  |
| 6  | -1.194119 | 0.885032  | -1.006085 |
| 6  | -2.707413 | 2.516762  | 0.269841  |
| 1  | -1.383456 | 1.152197  | 1.131789  |
| 6  | 0.034140  | 0.173178  | -0.764716 |
| 6  | -2.780775 | 3.220076  | 1.469933  |
| 6  | -3.399342 | 4.456272  | 1.540495  |
| 6  | -3.961407 | 5.018070  | 0.405655  |
| 6  | -3.895863 | 4.331365  | -0.793730 |
| 6  | -3.274374 | 3.093318  | -0.861636 |
| 1  | -2.348300 | 2.797618  | 2.360439  |
| 1  | -3.438294 | 4.979581  | 2.479188  |
| 1  | -4.441216 | 5.978994  | 0.455926  |
| 1  | -4.326336 | 4.756356  | -1.682951 |
| 1  | -3.233911 | 2.585974  | -1.806599 |
| 1  | 0.043615  | -0.525689 | 0.042719  |
| 7  | 1.111904  | 0.222874  | -1.465928 |
| 6  | 2.257253  | -0.725850 | -1.310821 |
| 6  | 3.005614  | -0.587743 | -2.656100 |
| 6  | 2.009330  | 0.065258  | -3.608239 |
| 6  | 1.267541  | 1.023916  | -2.698197 |
| 1  | 3.864832  | 0.056116  | -2.530292 |
| 1  | 3.362155  | -1.548938 | -2.999357 |
| 1  | 2.498076  | 0.574394  | -4.430725 |
| 1  | 1.295826  | -0.645516 | -4.001583 |
| 1  | 1.863257  | 1.896758  | -2.463588 |
| 1  | 0.308732  | 1.293800  | -3.089191 |
| 1  | 1.840005  | -1.717816 | -1.236696 |
| 6  | 3.194614  | -0.451953 | -0.084605 |
| 8  | 3.516108  | 0.908643  | -0.122467 |
| 14 | 3.395557  | 2.419441  | 0.548400  |
| 6  | 3.747384  | 3.623271  | -0.858763 |
| 1  | 2.971517  | 3.630368  | -1.616978 |
| 1  | 3.830248  | 4.637298  | -0.474128 |
| 1  | 4.686619  | 3.386134  | -1.352276 |
| 6  | 1.700630  | 2.766906  | 1.292405  |
| 1  | 1.430844  | 2.042730  | 2.055124  |
| 1  | 1.705722  | 3.747786  | 1.763481  |
| 1  | 0.916092  | 2.778308  | 0.541976  |
| 6  | 4.727694  | 2.717510  | 1.858097  |
| 1  | 5.673998  | 2.254527  | 1.589752  |
| 1  | 4.908184  | 3.786836  | 1.944646  |

|   |           |           |           |
|---|-----------|-----------|-----------|
| 1 | 4.450355  | 2.361130  | 2.844523  |
| 6 | 4.488482  | -1.271596 | -0.299901 |
| 6 | 5.708917  | -0.653608 | -0.527373 |
| 6 | 6.860212  | -1.404889 | -0.721022 |
| 6 | 6.807604  | -2.785525 | -0.699088 |
| 6 | 5.591726  | -3.413400 | -0.474188 |
| 6 | 4.447831  | -2.664285 | -0.270390 |
| 1 | 5.764521  | 0.415682  | -0.560639 |
| 1 | 7.796200  | -0.903361 | -0.892468 |
| 1 | 7.698986  | -3.367210 | -0.851261 |
| 1 | 5.534640  | -4.486939 | -0.448731 |
| 1 | 3.523435  | -3.175242 | -0.072135 |
| 6 | 2.641970  | -0.873624 | 1.294897  |
| 6 | 1.584999  | -1.750593 | 1.488313  |
| 6 | 1.178421  | -2.121321 | 2.766181  |
| 6 | 1.844182  | -1.644336 | 3.875551  |
| 6 | 2.937889  | -0.807641 | 3.697983  |
| 6 | 3.331763  | -0.438622 | 2.427951  |
| 1 | 1.051162  | -2.176163 | 0.661958  |
| 1 | 0.330312  | -2.770901 | 2.874289  |
| 1 | 1.528621  | -1.927060 | 4.863465  |
| 1 | 3.490329  | -0.451885 | 4.549474  |
| 1 | 4.206994  | 0.167765  | 2.311178  |
| 1 | -1.008810 | 1.814517  | -1.517430 |
| 6 | -3.823685 | -0.579557 | -0.633735 |
| 1 | -4.332364 | 0.266560  | -1.089306 |
| 6 | -4.925649 | -1.521050 | -0.150161 |
| 6 | -4.671378 | -2.839344 | 0.219232  |
| 6 | -5.689772 | -3.655474 | 0.682118  |
| 6 | -6.984012 | -3.172034 | 0.785480  |
| 6 | -7.251174 | -1.864235 | 0.420514  |
| 6 | -6.229462 | -1.050393 | -0.042333 |
| 1 | -3.676536 | -3.236958 | 0.142034  |
| 1 | -5.470408 | -4.670884 | 0.960615  |
| 1 | -7.773675 | -3.808145 | 1.143578  |
| 1 | -8.251863 | -1.476315 | 0.491521  |
| 1 | -6.452991 | -0.036486 | -0.327265 |
| 6 | -2.884141 | -1.149088 | -1.717652 |
| 6 | -1.988662 | -0.066517 | -2.353094 |
| 1 | -2.645861 | 0.751909  | -2.696156 |
| 8 | -1.109525 | -0.473472 | -3.171796 |
| 1 | -2.236245 | -1.909758 | -1.304429 |
| 6 | -3.680781 | -1.769414 | -2.874450 |
| 1 | -4.373854 | -1.046150 | -3.300333 |
| 1 | -2.991257 | -2.068597 | -3.651064 |
| 1 | -4.256565 | -2.631602 | -2.560924 |
| 1 | -3.868191 | 0.508176  | 1.213628  |
| 7 | -2.509346 | -0.959062 | 1.492953  |
| 8 | -1.679245 | -1.706120 | 1.050040  |
| 8 | -2.855830 | -0.951036 | 2.628764  |

NImag = 1, Imag. Freq = -385

<sup>a</sup> Optimization done at HF/6-31G\* level of theory

<sup>b</sup> Energy reported at HF/6-31G\* level of theory



| <b>5b</b>                                                                         |           |           |           |                              |           |           |           |
|-----------------------------------------------------------------------------------|-----------|-----------|-----------|------------------------------|-----------|-----------|-----------|
| <b>Et = -1266.4446413 (-2251.711569)</b>                                          |           |           |           |                              |           |           |           |
| 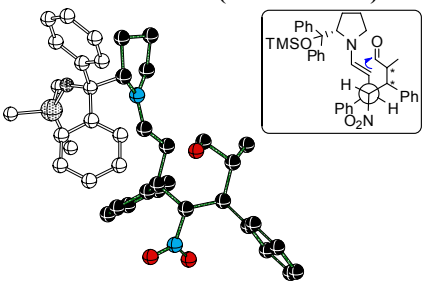 |           |           |           |                              |           |           |           |
| 6                                                                                 | 1.526289  | -1.017083 | 1.687053  | 6                            | -1.324513 | 0.889514  | 2.912136  |
| 6                                                                                 | 3.052017  | -1.069350 | 1.960015  | 1                            | -4.046972 | 0.677689  | 2.377466  |
| 6                                                                                 | 3.911592  | -0.636738 | 0.716076  | 1                            | -4.103530 | -1.018398 | 2.883991  |
| 6                                                                                 | 3.487027  | -0.359396 | 3.248586  | 1                            | -2.808756 | 0.727445  | 4.508658  |
| 1                                                                                 | 3.220253  | -2.140792 | 2.113376  | 1                            | -1.972681 | -0.785966 | 4.115147  |
| 6                                                                                 | 2.999040  | -0.183196 | -0.437865 | 1                            | -1.599812 | 1.943501  | 2.771044  |
| 1                                                                                 | 4.544997  | 0.211612  | 0.993830  | 1                            | -0.336533 | 0.835867  | 3.364657  |
| 6                                                                                 | 4.820926  | -1.773680 | 0.255813  | 1                            | -2.269954 | -1.625879 | 1.418076  |
| 6                                                                                 | 1.931350  | 0.919556  | -0.121623 | 6                            | -3.375668 | -0.354963 | 0.060159  |
| 6                                                                                 | 1.102804  | 0.514930  | 1.130051  | 8                            | -3.714246 | 0.992299  | -0.056328 |
| 6                                                                                 | 2.464220  | 2.347071  | -0.055964 | 14                           | -2.933813 | 2.439163  | -0.783346 |
| 1                                                                                 | 1.276230  | 0.891150  | -0.995907 | 6                            | -2.850565 | 3.564610  | 0.635267  |
| 6                                                                                 | -0.273444 | 0.145357  | 0.801015  | 1                            | -3.435933 | 3.155257  | 1.494013  |
| 1                                                                                 | 4.565600  | -0.465749 | 3.414054  | 1                            | -1.806528 | 3.724271  | 0.991672  |
| 1                                                                                 | 3.262589  | 0.714591  | 3.238484  | 1                            | -3.274662 | 4.568733  | 0.399462  |
| 1                                                                                 | 2.975581  | -0.789329 | 4.118421  | 6                            | -1.304005 | 2.155093  | -1.506037 |
| 6                                                                                 | 6.206425  | -1.603194 | 0.161851  | 1                            | -0.477673 | 2.250029  | -0.760552 |
| 6                                                                                 | 7.029472  | -2.655004 | -0.246716 | 1                            | -1.223448 | 1.137500  | -1.961455 |
| 6                                                                                 | 6.474407  | -3.891340 | -0.577528 | 1                            | -1.084359 | 2.887563  | -2.320121 |
| 6                                                                                 | 5.091326  | -4.069879 | -0.492778 | 6                            | -4.143135 | 2.975879  | -2.015614 |
| 6                                                                                 | 4.270248  | -3.022635 | -0.075794 | 1                            | -3.823068 | 2.734624  | -3.056069 |
| 1                                                                                 | 6.642703  | -0.636272 | 0.398039  | 1                            | -5.123217 | 2.466380  | -1.847749 |
| 1                                                                                 | 8.104296  | -2.504268 | -0.310804 | 1                            | -4.332913 | 4.073905  | -1.974761 |
| 1                                                                                 | 7.113734  | -4.709930 | -0.898481 | 6                            | -4.687203 | -1.128924 | 0.258263  |
| 1                                                                                 | 4.649954  | -5.030458 | -0.747026 | 6                            | -5.910824 | -0.460241 | 0.355187  |
| 1                                                                                 | 3.194144  | -3.163590 | 0.013012  | 6                            | -7.092090 | -1.183411 | 0.523972  |
| 6                                                                                 | 2.195513  | 3.219475  | -1.120644 | 6                            | -7.058887 | -2.574834 | 0.598529  |
| 6                                                                                 | 2.655847  | 4.536815  | -1.110794 | 6                            | -5.839351 | -3.245711 | 0.499351  |
| 6                                                                                 | 3.398448  | 5.010461  | -0.029628 | 6                            | -4.657890 | -2.527803 | 0.327076  |
| 6                                                                                 | 3.675741  | 4.154832  | 1.037589  | 1                            | -5.938184 | 0.639148  | 0.295125  |
| 6                                                                                 | 3.212899  | 2.839106  | 1.023670  | 1                            | -8.051691 | -0.650718 | 0.596075  |
| 1                                                                                 | 1.621217  | 2.858238  | -1.970924 | 1                            | -7.990897 | -3.143448 | 0.731006  |
| 1                                                                                 | 2.435047  | 5.190199  | -1.950629 | 1                            | -5.808677 | -4.344066 | 0.551149  |
| 1                                                                                 | 3.760331  | 6.035031  | -0.018905 | 1                            | -3.699827 | -3.062606 | 0.227632  |
| 1                                                                                 | 4.257838  | 4.509686  | 1.884190  | 6                            | -2.730067 | -0.947296 | -1.181858 |
| 1                                                                                 | 3.447202  | 2.190893  | 1.861299  | 6                            | -1.744897 | -1.941120 | -1.141641 |
| 1                                                                                 | -0.423886 | -0.353810 | -0.148954 | 6                            | -1.261994 | -2.504854 | -2.324441 |
| 7                                                                                 | -1.317704 | 0.230378  | 1.578295  | 6                            | -1.766904 | -2.101004 | -3.558413 |
| 6                                                                                 | -2.581493 | -0.574920 | 1.369782  | 6                            | -2.764533 | -1.127040 | -3.607906 |
| 6                                                                                 | -3.430325 | -0.201787 | 2.608611  | 6                            | -3.244668 | -0.561248 | -2.430347 |
| 6                                                                                 | -2.397307 | 0.130448  | 3.690629  | 1                            | -1.305115 | -2.296789 | -0.192086 |
|                                                                                   |           |           |           | 1                            | -0.470729 | -3.269224 | -2.270871 |
|                                                                                   |           |           |           | 1                            | -1.381903 | -2.547053 | -4.487310 |
|                                                                                   |           |           |           | 1                            | -3.177520 | -0.808603 | -4.576473 |
|                                                                                   |           |           |           | 1                            | -4.046649 | 0.195056  | -2.471172 |
|                                                                                   |           |           |           | 1                            | 1.184929  | 1.261042  | 1.921033  |
|                                                                                   |           |           |           | 1                            | 1.021101  | -1.017666 | 2.692410  |
|                                                                                   |           |           |           | 8                            | 1.070628  | -1.908442 | 0.815023  |
|                                                                                   |           |           |           | 7                            | 3.783848  | 0.327789  | -1.626898 |
|                                                                                   |           |           |           | 8                            | 3.201059  | 0.294878  | -2.712210 |
|                                                                                   |           |           |           | 8                            | 4.906551  | 0.790386  | -1.452262 |
|                                                                                   |           |           |           | 1                            | 2.440851  | -1.042171 | -0.806740 |
|                                                                                   |           |           |           | NImag = 1, Imag. Freq = -429 |           |           |           |

**5c**

**Et= -1266.448123 (-2251.715952)**

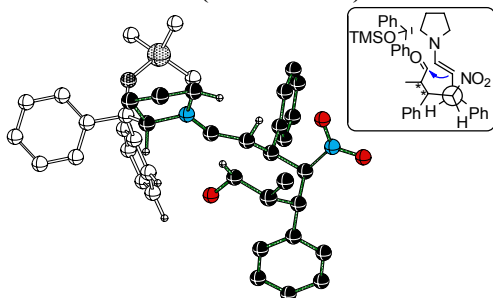

6 -1.603852 -1.265808 -1.667531  
 6 -3.100576 -1.549343 -2.021751  
 6 -4.157195 -1.023589 -1.003224  
 6 -3.439792 -1.102024 -3.455673  
 1 -3.158220 -2.644936 -1.994523  
 6 -3.857019 0.410999 -0.454262  
 1 -5.103074 -0.919357 -1.547924  
 6 -4.477135 -1.945983 0.177768  
 6 -2.387792 0.659758 -0.057311  
 6 -1.419558 0.378714 -1.210882  
 6 -2.224012 1.984981 0.684542  
 1 -2.204019 -0.142567 0.671687  
 6 -0.036098 0.185847 -0.791210  
 1 -4.463568 -1.384764 -3.728924  
 1 -3.352377 -0.017916 -3.588015  
 1 -2.764501 -1.580228 -4.174757  
 6 -5.781183 -1.919735 0.699340  
 6 -6.139927 -2.726365 1.778254  
 6 -5.194860 -3.578033 2.355243  
 6 -3.897400 -3.608839 1.844277  
 6 -3.532801 -2.800076 0.763212  
 1 -6.523458 -1.261159 0.251083  
 1 -7.156909 -2.695897 2.161577  
 1 -5.471236 -4.213640 3.193006  
 1 -3.156576 -4.270559 2.286931  
 1 -2.517371 -2.811367 0.362658  
 6 -2.504295 2.027273 2.059368  
 6 -2.417079 3.219521 2.777680  
 6 -2.042628 4.398733 2.130873  
 6 -1.754334 4.370583 0.766081  
 6 -1.843040 3.175102 0.049378  
 1 -2.793797 1.111706 2.571828  
 1 -2.638302 3.225786 3.841787  
 1 -1.975899 5.330566 2.685973  
 1 -1.465100 5.283575 0.251883  
 1 -1.634016 3.174262 -1.015098  
 1 0.122899 -0.206993 0.205974  
 7 1.028195 0.250499 -1.548547  
 6 2.236190 -0.636021 -1.308606  
 6 3.040171 -0.483731 -2.622801  
 6 1.985984 -0.149847 -3.683854

6 1.046729 0.790733 -2.933408  
 1 3.760006 0.340168 -2.520661  
 1 3.605328 -1.394419 -2.841169  
 1 2.409291 0.317367 -4.577158  
 1 1.443317 -1.050981 -3.990000  
 1 1.454504 1.810205 -2.892490  
 1 0.040440 0.829708 -3.343663  
 1 1.815428 -1.646263 -1.222413  
 6 3.128434 -0.359940 -0.077778  
 8 3.612411 0.946266 -0.129191  
 14 3.003176 2.541701 0.426532  
 6 2.871394 3.483383 -1.116915  
 1 3.370472 2.936868 -1.953378  
 1 1.813185 3.659782 -1.419303  
 1 3.362245 4.481882 -1.040220  
 6 1.447506 2.504431 1.333980  
 1 1.309731 3.429506 1.944287  
 1 0.552877 2.425484 0.668693  
 1 1.403336 1.641786 2.042983  
 6 4.371399 3.126243 1.458566  
 1 5.274952 2.487998 1.301770  
 1 4.664838 4.175385 1.222097  
 1 4.127198 3.087555 2.545539  
 6 4.342751 -1.286259 -0.250383  
 6 5.624488 -0.763123 -0.444348  
 6 6.716486 -1.619902 -0.586454  
 6 6.536307 -3.001100 -0.537162  
 6 5.258813 -3.526758 -0.340698  
 6 4.166097 -2.674808 -0.194858  
 1 5.768782 0.328133 -0.482659  
 1 7.722216 -1.200650 -0.736184  
 1 7.397975 -3.675146 -0.649123  
 1 5.111853 -4.615933 -0.295591  
 1 3.162812 -3.095441 -0.020409  
 6 2.509323 -0.744310 1.256605  
 6 1.471675 -1.675528 1.382425  
 6 1.019395 -2.059429 2.646770  
 6 1.603111 -1.535659 3.797848  
 6 2.650131 -0.620939 3.682524  
 6 3.101867 -0.235502 2.423781  
 1 0.972285 -2.125290 0.502504  
 1 0.194014 -2.784127 2.723624  
 1 1.245193 -1.844308 4.790847  
 1 3.126016 -0.209622 4.584815  
 1 3.942316 0.473766 2.334339  
 1 -1.566949 1.036089 -2.062448  
 1 -1.056610 -1.242137 -2.646742  
 8 -1.042741 -2.021815 -0.736750  
 7 -4.419893 1.443225 -1.432799  
 8 -5.638009 1.587147 -1.409876  
 8 -3.667647 2.049836 -2.196491  
 1 -4.492267 0.572875 0.416978

NImag = 1, Imag. Freq = -436

**5d** (NImag = 1, Imag. Freq = -462)  
**Et = -1266.445712 (-2251.713598)**

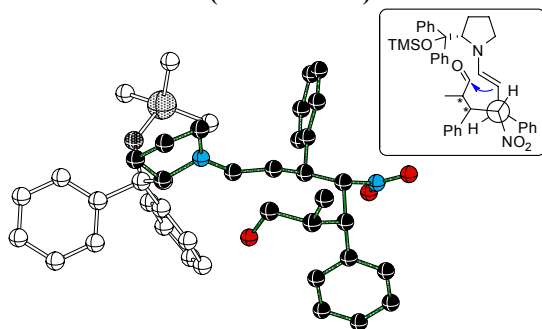

|   |           |           |           |
|---|-----------|-----------|-----------|
| 6 | 1.518542  | -1.249665 | 1.883812  |
| 6 | 3.016453  | -1.522893 | 2.245309  |
| 6 | 4.079794  | -1.014356 | 1.221140  |
| 6 | 3.350653  | -1.022371 | 3.661805  |
| 1 | 3.081753  | -2.618212 | 2.249451  |
| 6 | 3.779176  | 0.474068  | 0.844485  |
| 1 | 5.026767  | -0.951863 | 1.771065  |
| 6 | 4.365594  | -1.926947 | 0.027560  |
| 6 | 2.377802  | 0.757130  | 0.275799  |
| 1 | 3.948955  | 1.083008  | 1.735414  |
| 7 | 4.869623  | 0.941769  | -0.097744 |
| 6 | 1.359126  | 0.397331  | 1.372835  |
| 6 | 2.217547  | 2.202583  | -0.191621 |
| 1 | 2.221449  | 0.089227  | -0.577417 |
| 6 | -0.003090 | 0.193771  | 0.900054  |
| 1 | 4.370312  | -1.298655 | 3.954261  |
| 1 | 3.271470  | 0.069593  | 3.751924  |
| 1 | 2.665461  | -1.458580 | 4.397587  |
| 6 | 5.696928  | -2.059044 | -0.400758 |
| 6 | 6.030014  | -2.882752 | -1.475338 |
| 6 | 5.033205  | -3.598342 | -2.140009 |
| 6 | 3.709092  | -3.481212 | -1.716629 |
| 6 | 3.370988  | -2.655326 | -0.641785 |
| 1 | 6.483003  | -1.505984 | 0.108979  |
| 1 | 7.067729  | -2.967394 | -1.788103 |
| 1 | 5.288773  | -4.246334 | -2.974962 |
| 1 | 2.927028  | -4.044147 | -2.220969 |
| 1 | 2.341663  | -2.585375 | -0.287848 |
| 8 | 4.652136  | 0.921651  | -1.303198 |
| 8 | 5.937513  | 1.262445  | 0.424298  |
| 6 | 1.892510  | 2.486906  | -1.523660 |
| 6 | 1.734528  | 3.803819  | -1.959347 |
| 6 | 1.907441  | 4.863994  | -1.068825 |
| 6 | 2.236967  | 4.595975  | 0.260952  |
| 6 | 2.387175  | 3.278108  | 0.693566  |
| 1 | 1.781205  | 1.667767  | -2.229525 |
| 1 | 1.486904  | 3.999371  | -2.999366 |
| 1 | 1.793976  | 5.889910  | -1.408491 |
| 1 | 2.382226  | 5.413216  | 0.962784  |
| 1 | 2.648557  | 3.091647  | 1.733205  |

|    |           |           |           |
|----|-----------|-----------|-----------|
| 1  | -0.102906 | -0.253881 | -0.081648 |
| 7  | -1.108301 | 0.292792  | 1.590425  |
| 6  | -2.301661 | -0.606294 | 1.317455  |
| 6  | -3.173088 | -0.413109 | 2.582601  |
| 6  | -2.176955 | -0.035281 | 3.684221  |
| 6  | -1.203958 | 0.884283  | 2.950483  |
| 1  | -3.890817 | 0.401679  | 2.414330  |
| 1  | -3.743799 | -1.319515 | 2.803902  |
| 1  | -2.648226 | 0.460234  | 4.537366  |
| 1  | -1.646969 | -0.921887 | 4.049089  |
| 1  | -1.611644 | 1.899501  | 2.850688  |
| 1  | -0.221080 | 0.941826  | 3.412174  |
| 1  | -1.872807 | -1.616192 | 1.285888  |
| 6  | -3.129105 | -0.368249 | 0.034262  |
| 8  | -3.609560 | 0.940484  | 0.027427  |
| 14 | -2.999006 | 2.512853  | -0.588059 |
| 6  | -2.857981 | 3.511349  | 0.918205  |
| 1  | -3.398001 | 3.023065  | 1.764995  |
| 1  | -1.799546 | 3.655425  | 1.236196  |
| 1  | -3.302914 | 4.525836  | 0.788386  |
| 6  | -1.450511 | 2.448494  | -1.506217 |
| 1  | -0.603174 | 2.036853  | -0.905402 |
| 1  | -1.537882 | 1.810844  | -2.419502 |
| 1  | -1.129367 | 3.462948  | -1.846781 |
| 6  | -4.374452 | 3.059189  | -1.631498 |
| 1  | -5.274956 | 2.423644  | -1.447917 |
| 1  | -4.669991 | 4.114789  | -1.429027 |
| 1  | -4.136464 | 2.984158  | -2.717959 |
| 6  | -4.352539 | -1.287935 | 0.171344  |
| 6  | -5.641808 | -0.758585 | 0.279484  |
| 6  | -6.741643 | -1.610127 | 0.388802  |
| 6  | -6.561881 | -2.992256 | 0.392020  |
| 6  | -5.276692 | -3.524227 | 0.281467  |
| 6  | -4.175941 | -2.677615 | 0.168738  |
| 1  | -5.785926 | 0.333371  | 0.275902  |
| 1  | -7.753169 | -1.186088 | 0.470601  |
| 1  | -7.429764 | -3.662210 | 0.477548  |
| 1  | -5.129716 | -4.614354 | 0.277764  |
| 1  | -3.165562 | -3.103882 | 0.061806  |
| 6  | -2.442392 | -0.791374 | -1.253933 |
| 6  | -1.403797 | -1.728912 | -1.298820 |
| 6  | -0.881344 | -2.143350 | -2.525849 |
| 6  | -1.397361 | -1.646092 | -3.720356 |
| 6  | -2.447334 | -0.728180 | -3.686272 |
| 6  | -2.967757 | -0.311378 | -2.464510 |
| 1  | -0.959830 | -2.161544 | -0.381548 |
| 1  | -0.053721 | -2.869814 | -2.538741 |
| 1  | -0.983301 | -1.977755 | -4.683798 |
| 1  | -2.871143 | -0.338846 | -4.623619 |
| 1  | -3.809897 | 0.401253  | -2.439438 |
| 1  | 1.451004  | 1.061177  | 2.233445  |
| 1  | 0.974660  | -1.161173 | 2.863122  |
| 8  | 0.940290  | -2.040242 | 1.003023  |
